# Supplementary material for: Development and validation of gradient boosting decision tree models for predicting care needs using a long-term care database in Japan
Source: bioRxiv or medRxiv preprint supplement (doi:10.1101/2021.01.20.21250146), 2021-01-26
Supplement: Supplementary file [file media-1.pdf]

### Appendix A

Results of the logistic regression model to clarify the factors related to increase in care needs of long-term care insureds in Japan in 3 years.

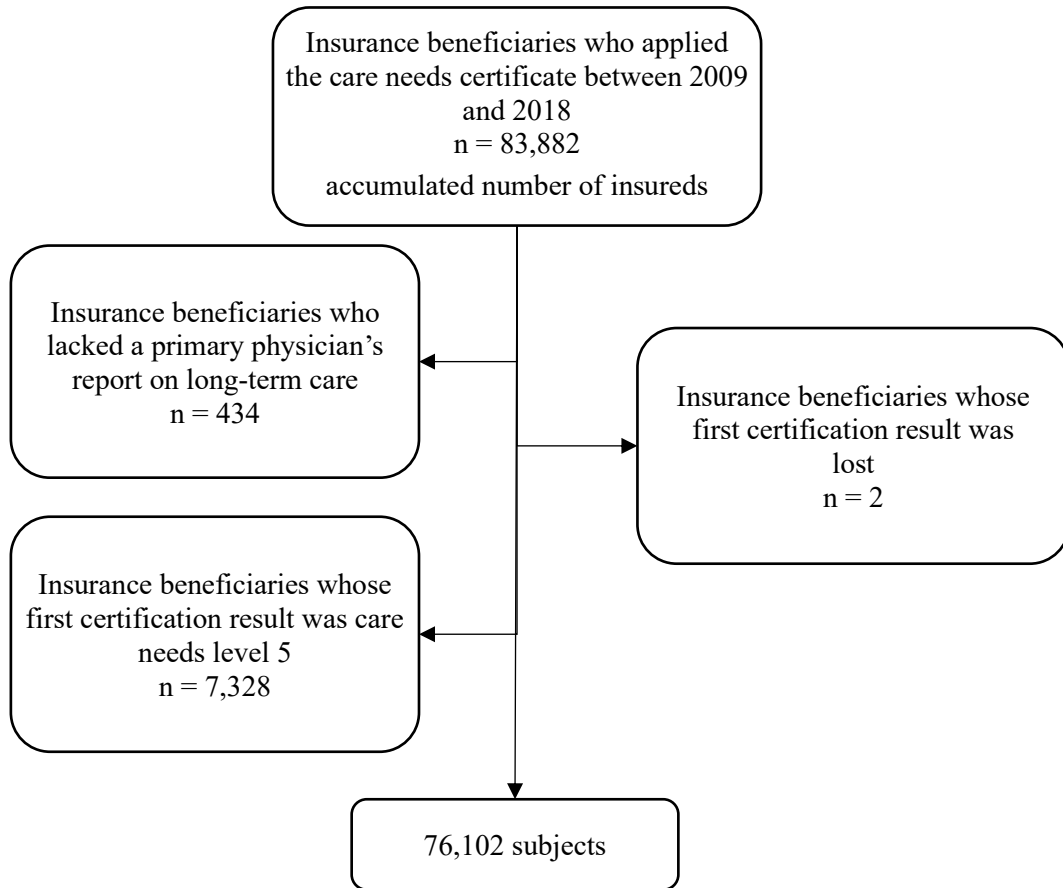

Fig. A.1. Flow chart of data selection; the study sample for analysis comprised 76,102 subjects.

Table A.1.

Demographic Characteristics and Chi-Square Test Result of Numbers of Stable or Improved and Deteriorated Groups.

| Variables                                            | Stable or Improved<br>(care needs remained<br>the same or<br>decreased)<br>n = 35,289 | Deteriorated (care<br>needs increased)<br>n = 40,813 | Total<br>n = 76,102 | Deterioration<br>Proportion<br>(%) | % in each<br>category | P value* |
|------------------------------------------------------|---------------------------------------------------------------------------------------|------------------------------------------------------|---------------------|------------------------------------|-----------------------|----------|
| Sex                                                  |                                                                                       |                                                      |                     |                                    |                       | <0.0001  |
| Male                                                 | 10,879                                                                                | 13,835                                               | 24,714              | 56.0%                              | 32.5%                 |          |
| Female                                               | 24,410                                                                                | 26,978                                               | 51,388              | 52.5%                              | 67.5%                 |          |
| Former care needs certification result_1st judgment  |                                                                                       |                                                      |                     |                                    |                       | <0.0001  |
| Unknown                                              | 6,100                                                                                 | 8,298                                                | 14,398              | 57.6%                              | 18.9%                 |          |
| Unqualified                                          | 718                                                                                   | 1,095                                                | 1,813               | 60.4%                              | 2.4%                  |          |
| Temporary long-term care level                       | 303                                                                                   | 512                                                  | 815                 | 62.8%                              | 1.1%                  |          |
| Support required level 1                             | 5,799                                                                                 | 5,974                                                | 11,773              | 50.7%                              | 15.5%                 |          |
| Support required level 2                             | 5,606                                                                                 | 6,332                                                | 11,938              | 53.0%                              | 15.7%                 |          |
| Care needs level 1                                   | 6,660                                                                                 | 8,497                                                | 15,157              | 56.1%                              | 19.9%                 |          |
| Care needs level 2                                   | 4,788                                                                                 | 5,129                                                | 9,917               | 51.7%                              | 13.0%                 |          |
| Care needs level 3                                   | 2,759                                                                                 | 2,249                                                | 5,008               | 44.9%                              | 6.6%                  |          |
| Care needs level 4                                   | 2,086                                                                                 | 1,866                                                | 3,952               | 47.2%                              | 5.2%                  |          |
| Care needs level 5                                   | 470                                                                                   | 861                                                  | 1,331               | 64.7%                              | 1.7%                  |          |
| Former care needs certification result_2nds judgment |                                                                                       |                                                      |                     |                                    |                       | <0.0001  |
| Unknown                                              | 5,781                                                                                 | 7,926                                                | 13,707              | 57.8%                              | 18.0%                 |          |
| Unqualified                                          | 224                                                                                   | 343                                                  | 567                 | 60.5%                              | 0.7%                  |          |

| Variables                      | Stable or Improved<br>(care needs remained<br>the same or<br>decreased)<br>n = 35,289 | Deteriorated (care<br>needs increased)<br>n = 40,813 | Total<br>n = 76,102 | Deterioration<br>Proportion<br>(%) | % in each<br>category | P value* |
|--------------------------------|---------------------------------------------------------------------------------------|------------------------------------------------------|---------------------|------------------------------------|-----------------------|----------|
| Temporary long-term care level | 55                                                                                    | 80                                                   | 135                 | 59.3%                              | 0.2%                  |          |
| Support required level 1       | 5,896                                                                                 | 5,918                                                | 11,814              | 50.1%                              | 15.5%                 |          |
| Support required level 2       | 5,385                                                                                 | 5,753                                                | 11,138              | 51.7%                              | 14.6%                 |          |
| Care needs level 1             | 6,741                                                                                 | 8,257                                                | 14,998              | 55.1%                              | 19.7%                 |          |
| Care needs level 2             | 4,997                                                                                 | 5,803                                                | 10,800              | 53.7%                              | 14.2%                 |          |
| Care needs level 3             | 3,379                                                                                 | 3,570                                                | 6,949               | 51.4%                              | 9.1%                  |          |
| care needs level 4             | 2,389                                                                                 | 2,043                                                | 4,432               | 46.1%                              | 5.8%                  |          |
| Care needs level 5             | 442                                                                                   | 1,120                                                | 1,562               | 71.7%                              | 2.1%                  |          |
| Living arrangement             |                                                                                       |                                                      |                     |                                    |                       | 0.076    |
| Unknown                        | 2                                                                                     | 0                                                    | 2                   | 0.0%                               | 0.0%                  |          |
| Home                           | 34,332                                                                                | 39,788                                               | 74,120              | 53.7%                              | 97.4%                 |          |
| Facility                       | 955                                                                                   | 1,025                                                | 1,980               | 51.8%                              | 2.6%                  |          |
| Care Needs Level_1st judgment  |                                                                                       |                                                      |                     |                                    |                       | <0.0001  |
| Unqualified                    | 16                                                                                    | 1,799                                                | 1,815               | 99.1%                              | 2.4%                  |          |
| Support required level 1       | 5,572                                                                                 | 8,290                                                | 13,862              | 59.8%                              | 18.2%                 |          |
| Support required level 2       | 6,518                                                                                 | 7,467                                                | 13,985              | 53.4%                              | 18.4%                 |          |
| Care needs level 1             | 6,827                                                                                 | 9,914                                                | 16,741              | 59.2%                              | 22.0%                 |          |
| Care needs level 2             | 6,593                                                                                 | 6,638                                                | 13,231              | 50.2%                              | 17.4%                 |          |
| Care needs level 3             | 4,210                                                                                 | 3,532                                                | 7,742               | 45.6%                              | 10.2%                 |          |

| Variables                                                            | Stable or Improved<br>(care needs remained<br>the same or<br>decreased)<br>n = 35,289 | Deteriorated (care<br>needs increased)<br>n = 40,813 | Total<br>n = 76,102 | Deterioration<br>Proportion<br>(%) | % in each<br>category | P value* |
|----------------------------------------------------------------------|---------------------------------------------------------------------------------------|------------------------------------------------------|---------------------|------------------------------------|-----------------------|----------|
| Care needs level 4                                                   | 5,553                                                                                 | 3,173                                                | 8,726               | 36.4%                              | 11.5%                 |          |
| Care Needs Level_2nd judgment                                        |                                                                                       |                                                      |                     |                                    |                       | <0.0001  |
| Unqualified                                                          | 41                                                                                    | 366                                                  | 407                 | 89.9%                              | 0.5%                  |          |
| Support required level 1                                             | 5,596                                                                                 | 7,595                                                | 13,191              | 57.6%                              | 17.3%                 |          |
| Support required level 2                                             | 6,199                                                                                 | 5,876                                                | 12,075              | 48.7%                              | 15.9%                 |          |
| Care needs level 1                                                   | 7,035                                                                                 | 10,049                                               | 17,084              | 58.8%                              | 22.4%                 |          |
| Care needs level 2                                                   | 6,531                                                                                 | 7,079                                                | 13,610              | 52.0%                              | 17.9%                 |          |
| Care needs level 3                                                   | 4,389                                                                                 | 5,433                                                | 9,822               | 55.3%                              | 12.9%                 |          |
| Care needs level 4                                                   | 5,439                                                                                 | 3,287                                                | 8,726               | 37.7%                              | 11.5%                 |          |
| Care needs level 5                                                   | 59                                                                                    | 1,128                                                | 1,187               | 95.0%                              | 1.6%                  |          |
| Degree of independent living for elderly with disability             |                                                                                       |                                                      |                     |                                    |                       | <0.0001  |
| Dependent                                                            | 164                                                                                   | 274                                                  | 438                 | 62.6%                              | 0.6%                  |          |
| J 1 (able to go out using public<br>transportation)                  | 3,514                                                                                 | 3,344                                                | 6,858               | 48.8%                              | 9.0%                  |          |
| J 2 (able to go out but limited to the<br>neighborhood)              | 6,999                                                                                 | 8,186                                                | 15,185              | 53.9%                              | 20.0%                 |          |
| A 1 (able to go out with assistance and<br>usually not bedridden)    | 7,195                                                                                 | 9,927                                                | 17,122              | 58.0%                              | 22.5%                 |          |
| A 2 (rarely able to go out and naps several<br>times during daytime) | 8,363                                                                                 | 11,249                                               | 19,612              | 57.4%                              | 25.8%                 |          |

| Variables                                                                    | Stable or Improved<br>(care needs remained<br>the same or<br>decreased)<br>n = 35,289 | Deteriorated (care<br>needs increased)<br>n = 40,813 | Total<br>n = 76,102 | Deterioration<br>Proportion<br>(%) | % in each<br>category | P value* |
|------------------------------------------------------------------------------|---------------------------------------------------------------------------------------|------------------------------------------------------|---------------------|------------------------------------|-----------------------|----------|
| B 1 (able to eat and use a wheelchair to<br>access the toilet away from bed) | 3,491                                                                                 | 3,442                                                | 6,933               | 49.6%                              | 9.1%                  |          |
| B 2 (requires care to get on a wheelchair)                                   | 4,222                                                                                 | 2,729                                                | 6,951               | 39.3%                              | 9.1%                  |          |
| C 1 (able to roll over by him/herself)                                       | 794                                                                                   | 612                                                  | 1,406               | 43.5%                              | 1.8%                  |          |
| C 2 (fully assisted in rolling over by<br>him/herself)                       | 547                                                                                   | 1,050                                                | 1,597               | 65.7%                              | 2.1%                  |          |
| Degree of independent living for elderly people with dementia                |                                                                                       |                                                      |                     |                                    |                       | <0.0001  |
| Dependent                                                                    | 9,478                                                                                 | 9,365                                                | 18,843              | 49.7%                              | 24.8%                 |          |
| I                                                                            | 9,917                                                                                 | 11,536                                               | 21,453              | 53.8%                              | 28.2%                 |          |
| II a                                                                         | 3,902                                                                                 | 4,279                                                | 8,181               | 52.3%                              | 10.8%                 |          |
| II b                                                                         | 6,495                                                                                 | 7,221                                                | 13,716              | 52.6%                              | 18.0%                 |          |
| III a                                                                        | 3,775                                                                                 | 5,450                                                | 9,225               | 59.1%                              | 12.1%                 |          |
| III b                                                                        | 869                                                                                   | 1,251                                                | 2,120               | 59.0%                              | 2.8%                  |          |
| IV                                                                           | 759                                                                                   | 1,442                                                | 2,201               | 65.5%                              | 2.9%                  |          |
| M                                                                            | 94                                                                                    | 269                                                  | 363                 | 74.1%                              | 0.5%                  |          |
| Short-term memory                                                            |                                                                                       |                                                      |                     |                                    |                       | <0.0001  |
| Loss                                                                         | 12,432                                                                                | 12,864                                               | 25,296              | 50.9%                              | 33.2%                 |          |
| Unknown                                                                      | 11                                                                                    | 3                                                    | 14                  | 21.4%                              | 0.0%                  |          |
| Independent                                                                  | 11,066                                                                                | 11,962                                               | 23,028              | 51.9%                              | 30.3%                 |          |
| With difficulty                                                              | 11,780                                                                                | 15,984                                               | 27,764              | 57.6%                              | 36.5%                 |          |

| Variables                                 | Stable or Improved<br>(care needs remained<br>the same or<br>decreased)<br>n = 35,289 | Deteriorated (care<br>needs increased)<br>n = 40,813 | Total<br>n = 76,102 | Deterioration<br>Proportion<br>(%) | % in each<br>category | P value* |
|-------------------------------------------|---------------------------------------------------------------------------------------|------------------------------------------------------|---------------------|------------------------------------|-----------------------|----------|
| Cognitive ability (daily decision-making) |                                                                                       |                                                      |                     |                                    |                       | <0.0001  |
| Loss                                      | 12,432                                                                                | 12,864                                               | 25,296              | 50.9%                              | 33.2%                 |          |
| Unknown                                   | 13                                                                                    | 5                                                    | 18                  | 27.8%                              | 0.0%                  |          |
| Independent                               | 11,208                                                                                | 12,289                                               | 23,497              | 52.3%                              | 30.9%                 |          |
| Some difficulty                           | 6,482                                                                                 | 8,183                                                | 14,665              | 55.8%                              | 19.3%                 |          |
| Partially assisted                        | 3,903                                                                                 | 5,374                                                | 9,277               | 57.9%                              | 12.2%                 |          |
| Fully assisted                            | 1,251                                                                                 | 2,098                                                | 3,349               | 62.6%                              | 4.4%                  |          |
| Communication ability                     |                                                                                       |                                                      |                     |                                    |                       | <0.0001  |
| Unknown                                   | 14                                                                                    | 7                                                    | 21                  | 33.3%                              | 0.0%                  |          |
| Capable                                   | 13,528                                                                                | 15,312                                               | 28,840              | 53.1%                              | 37.9%                 |          |
| Somewhat challenging                      | 5,876                                                                                 | 7,572                                                | 13,448              | 56.3%                              | 17.7%                 |          |
| Limited to specific requirements          | 2,953                                                                                 | 4,050                                                | 7,003               | 57.8%                              | 9.2%                  |          |
| Incapable                                 | 486                                                                                   | 1,008                                                | 1,494               | 67.5%                              | 2.0%                  |          |
| Eating                                    |                                                                                       |                                                      |                     |                                    |                       | <0.0001  |
| Unknown                                   | 17                                                                                    | 25                                                   | 42                  | 59.5%                              | 0.1%                  |          |
| Independent                               | 22,326                                                                                | 26,937                                               | 49,263              | 54.7%                              | 64.7%                 |          |
| Needs to be fed                           | 514                                                                                   | 987                                                  | 1,501               | 65.8%                              | 2.0%                  |          |
| BPSD                                      |                                                                                       |                                                      |                     |                                    |                       | <0.0001  |
| None                                      | 5,225                                                                                 | 5,686                                                | 10,911              | 52.1%                              | 14.3%                 |          |

| Variables                 | Stable or Improved<br>(care needs remained<br>the same or<br>decreased)<br>n = 35,289 | Deteriorated (care<br>needs increased)<br>n = 40,813 | Total<br>n = 76,102 | Deterioration<br>Proportion<br>(%) | % in each<br>category | P value* |
|---------------------------|---------------------------------------------------------------------------------------|------------------------------------------------------|---------------------|------------------------------------|-----------------------|----------|
| Yes                       | 3,272                                                                                 | 5,204                                                | 8,476               | 61.4%                              | 11.1%                 |          |
| No                        | 14,360                                                                                | 17,059                                               | 31,419              | 54.3%                              | 41.3%                 |          |
| Turn in bed               |                                                                                       |                                                      |                     |                                    |                       | <0.0001  |
| Independent               | 11,742                                                                                | 17,824                                               | 29,566              | 60.3%                              | 38.9%                 |          |
| Can do holding railings   | 20,575                                                                                | 20,069                                               | 40,644              | 49.4%                              | 53.4%                 |          |
| Fully assisted            | 2,972                                                                                 | 2,920                                                | 5,892               | 49.6%                              | 7.7%                  |          |
| Get up                    |                                                                                       |                                                      |                     |                                    |                       | <0.0001  |
| Independent               | 2,738                                                                                 | 4,963                                                | 7,701               | 64.4%                              | 10.1%                 |          |
| Can do holding railings   | 28,633                                                                                | 32,345                                               | 60,978              | 53.0%                              | 80.1%                 |          |
| Fully assisted            | 3,918                                                                                 | 3,505                                                | 7,423               | 47.2%                              | 9.8%                  |          |
| Maintain sitting position |                                                                                       |                                                      |                     |                                    |                       | <0.0001  |
| Independent               | 12,519                                                                                | 17,827                                               | 30,346              | 58.7%                              | 39.9%                 |          |
| Can do holding railings   | 13,864                                                                                | 15,032                                               | 28,896              | 52.0%                              | 38.0%                 |          |
| Partially assisted        | 8,626                                                                                 | 7,312                                                | 15,938              | 45.9%                              | 20.9%                 |          |
| Fully assisted            | 280                                                                                   | 642                                                  | 922                 | 69.6%                              | 1.2%                  |          |
| Stand on both feet        |                                                                                       |                                                      |                     |                                    |                       | <0.0001  |
| Independent               | 15,376                                                                                | 21,239                                               | 36,615              | 58.0%                              | 48.1%                 |          |
| Partially assisted        | 16,690                                                                                | 16,636                                               | 33,326              | 49.9%                              | 43.8%                 |          |
| Fully assisted            | 3,223                                                                                 | 2,938                                                | 6,161               | 47.7%                              | 8.1%                  |          |

| Variables                        | Stable or Improved<br>(care needs remained<br>the same or<br>decreased)<br>n = 35,289 | Deteriorated (care<br>needs increased)<br>n = 40,813 | Total<br>n = 76,102 | Deterioration<br>Proportion<br>(%) | % in each<br>category | P value* |
|----------------------------------|---------------------------------------------------------------------------------------|------------------------------------------------------|---------------------|------------------------------------|-----------------------|----------|
| Walk                             |                                                                                       |                                                      |                     |                                    |                       | <0.0001  |
| Independent                      | 8,718                                                                                 | 12,402                                               | 21,120              | 58.7%                              | 27.8%                 |          |
| Can do with assistive technology | 19,301                                                                                | 22,299                                               | 41,600              | 53.6%                              | 54.7%                 |          |
| Fully assisted                   | 7,270                                                                                 | 6,112                                                | 13,382              | 45.7%                              | 17.6%                 |          |
| Transfer                         |                                                                                       |                                                      |                     |                                    |                       | <0.0001  |
| Independent                      | 20,631                                                                                | 27,936                                               | 48,567              | 57.5%                              | 63.8%                 |          |
| Needs supervision                | 6,700                                                                                 | 7,025                                                | 13,725              | 51.2%                              | 18.0%                 |          |
| Partially assisted               | 5,514                                                                                 | 3,523                                                | 9,037               | 39.0%                              | 11.9%                 |          |
| Fully assisted                   | 2,444                                                                                 | 2,329                                                | 4,773               | 48.8%                              | 6.3%                  |          |
| Stand up                         |                                                                                       |                                                      |                     |                                    |                       | <0.0001  |
| Independent                      | 1,027                                                                                 | 2,955                                                | 3,982               | 74.2%                              | 5.2%                  |          |
| Can do holding railings          | 30,411                                                                                | 34,545                                               | 64,956              | 53.2%                              | 85.4%                 |          |
| Fully assisted                   | 3,851                                                                                 | 3,313                                                | 7,164               | 46.2%                              | 9.4%                  |          |
| Stand on one foot                |                                                                                       |                                                      |                     |                                    |                       | <0.0001  |
| Independent                      | 1,909                                                                                 | 3,369                                                | 5,278               | 63.8%                              | 6.9%                  |          |
| Partially assisted               | 21,312                                                                                | 26,671                                               | 47,983              | 55.6%                              | 63.1%                 |          |
| Fully assisted                   | 12,068                                                                                | 10,773                                               | 22,841              | 47.2%                              | 30.0%                 |          |
| Bathing                          |                                                                                       |                                                      |                     |                                    |                       | <0.0001  |
| Independent                      | 13,659                                                                                | 16,599                                               | 30,258              | 54.9%                              | 39.8%                 |          |



| Variables          | Stable or Improved<br>(care needs remained<br>the same or<br>decreased)<br>n = 35,289 | Deteriorated (care<br>needs increased)<br>n = 40,813 | Total<br>n = 76,102 | Deterioration<br>Proportion<br>(%) | % in each<br>category | P value* |
|--------------------|---------------------------------------------------------------------------------------|------------------------------------------------------|---------------------|------------------------------------|-----------------------|----------|
| Partially assisted | 11,511                                                                                | 13,982                                               | 25,493              | 54.8%                              | 33.5%                 |          |
| Fully assisted     | 7,984                                                                                 | 7,793                                                | 15,777              | 49.4%                              | 20.7%                 |          |
| Does not take bath | 2,135                                                                                 | 2,439                                                | 4,574               | 53.3%                              | 6.0%                  |          |
| Swallowing         |                                                                                       |                                                      |                     |                                    |                       | <0.0001  |
| Independent        | 26,431                                                                                | 32,093                                               | 58,524              | 54.8%                              | 76.9%                 |          |
| Needs supervision  | 8,635                                                                                 | 7,888                                                | 16,523              | 47.7%                              | 21.7%                 |          |
| Fully assisted     | 223                                                                                   | 832                                                  | 1,055               | 78.9%                              | 1.4%                  |          |
| Eating             |                                                                                       |                                                      |                     |                                    |                       | <0.0001  |
| Independent        | 28,818                                                                                | 33,982                                               | 62,800              | 54.1%                              | 82.5%                 |          |
| Needs supervision  | 4,146                                                                                 | 4,439                                                | 8,585               | 51.7%                              | 11.3%                 |          |
| Partially assisted | 1,969                                                                                 | 1,394                                                | 3,363               | 41.5%                              | 4.4%                  |          |
| Fully assisted     | 356                                                                                   | 998                                                  | 1,354               | 73.7%                              | 1.8%                  |          |
| Oral hygiene       |                                                                                       |                                                      |                     |                                    |                       | <0.0001  |
| Independent        | 23,642                                                                                | 28,750                                               | 52,392              | 54.9%                              | 68.8%                 |          |
| Partially assisted | 9,545                                                                                 | 9,580                                                | 19,125              | 50.1%                              | 25.1%                 |          |
| Fully assisted     | 2,102                                                                                 | 2,483                                                | 4,585               | 54.2%                              | 6.0%                  |          |
| Washing face       |                                                                                       |                                                      |                     |                                    |                       | <0.0001  |
| Independent        | 23,568                                                                                | 29,054                                               | 52,622              | 55.2%                              | 69.1%                 |          |
| Partially assisted | 9,623                                                                                 | 9,292                                                | 18,915              | 49.1%                              | 24.9%                 |          |

| Variables                 | Stable or Improved<br>(care needs remained<br>the same or<br>decreased)<br>n = 35,289 | Deteriorated (care<br>needs increased)<br>n = 40,813 | Total<br>n = 76,102 | Deterioration<br>Proportion<br>(%) | % in each<br>category | P value* |
|---------------------------|---------------------------------------------------------------------------------------|------------------------------------------------------|---------------------|------------------------------------|-----------------------|----------|
| Fully assisted            | 2,098                                                                                 | 2,467                                                | 4,565               | 54.0%                              | 6.0%                  |          |
| Hair care                 |                                                                                       |                                                      |                     |                                    |                       | <0.0001  |
| Independent               | 25,800                                                                                | 31,066                                               | 56,866              | 54.6%                              | 74.7%                 |          |
| Partially assisted        | 6,004                                                                                 | 6,057                                                | 12,061              | 50.2%                              | 15.8%                 |          |
| Fully assisted            | 3,485                                                                                 | 3,690                                                | 7,175               | 51.4%                              | 9.4%                  |          |
| Nail-cutting              |                                                                                       |                                                      |                     |                                    |                       | <0.0001  |
| Independent               | 13,044                                                                                | 16,303                                               | 29,347              | 55.6%                              | 38.6%                 |          |
| Partially assisted        | 8,910                                                                                 | 10,085                                               | 18,995              | 53.1%                              | 25.0%                 |          |
| Fully assisted            | 13,335                                                                                | 14,425                                               | 27,760              | 52.0%                              | 36.5%                 |          |
| Putting on/removing top   |                                                                                       |                                                      |                     |                                    |                       | <0.0001  |
| Independent               | 19,826                                                                                | 24,869                                               | 44,695              | 55.6%                              | 58.7%                 |          |
| Needs supervision         | 2,795                                                                                 | 4,673                                                | 7,468               | 62.6%                              | 9.8%                  |          |
| Partially assisted        | 9,783                                                                                 | 8,444                                                | 18,227              | 46.3%                              | 24.0%                 |          |
| Fully assisted            | 2,885                                                                                 | 2,827                                                | 5,712               | 49.5%                              | 7.5%                  |          |
| Putting on/removing pants |                                                                                       |                                                      |                     |                                    |                       | <0.0001  |
| Independent               | 18,836                                                                                | 24,133                                               | 42,969              | 56.2%                              | 56.5%                 |          |
| Needs supervision         | 2,739                                                                                 | 4,487                                                | 7,226               | 62.1%                              | 9.5%                  |          |
| Partially assisted        | 8,805                                                                                 | 8,109                                                | 16,914              | 47.9%                              | 22.2%                 |          |
| Fully assisted            | 4,909                                                                                 | 4,084                                                | 8,993               | 45.4%                              | 11.8%                 |          |

| Variables                | Stable or Improved<br>(care needs remained<br>the same or<br>decreased)<br>n = 35,289 | Deteriorated (care<br>needs increased)<br>n = 40,813 | Total<br>n = 76,102 | Deterioration<br>Proportion<br>(%) | % in each<br>category | P value* |
|--------------------------|---------------------------------------------------------------------------------------|------------------------------------------------------|---------------------|------------------------------------|-----------------------|----------|
| Taking medication        |                                                                                       |                                                      |                     |                                    |                       | 0.048    |
| Independent              | 14,734                                                                                | 16,962                                               | 31,696              | 53.5%                              | 41.6%                 |          |
| Partially assisted       | 15,489                                                                                | 18,206                                               | 33,695              | 54.0%                              | 44.3%                 |          |
| Fully assisted           | 5,066                                                                                 | 5,645                                                | 10,711              | 52.7%                              | 14.1%                 |          |
| Managing money           |                                                                                       |                                                      |                     |                                    |                       | <0.0001  |
| Independent              | 12,791                                                                                | 14,261                                               | 27,052              | 52.7%                              | 35.5%                 |          |
| Partially assisted       | 7,320                                                                                 | 8,957                                                | 16,277              | 55.0%                              | 21.4%                 |          |
| Fully assisted           | 15,178                                                                                | 17,595                                               | 32,773              | 53.7%                              | 43.1%                 |          |
| Vision                   |                                                                                       |                                                      |                     |                                    |                       | <0.0001  |
| Normal                   | 23,788                                                                                | 28,364                                               | 52,152              | 54.4%                              | 68.5%                 |          |
| Able to see over 1m away | 9,180                                                                                 | 9,669                                                | 18,849              | 51.3%                              | 24.8%                 |          |
| Nearsightedness          | 1,726                                                                                 | 1,794                                                | 3,520               | 51.0%                              | 4.6%                  |          |
| Poor sight               | 434                                                                                   | 472                                                  | 906                 | 52.1%                              | 1.2%                  |          |
| Cannot be judged         | 161                                                                                   | 514                                                  | 675                 | 76.1%                              | 0.9%                  |          |
| Hearing ability          |                                                                                       |                                                      |                     |                                    |                       | <0.0001  |
| Normal                   | 17,935                                                                                | 20,977                                               | 38,912              | 53.9%                              | 51.1%                 |          |
| Manages to hear          | 10,771                                                                                | 11,823                                               | 22,594              | 52.3%                              | 29.7%                 |          |
| Can hear loud sounds     | 6,039                                                                                 | 7,132                                                | 13,171              | 54.1%                              | 17.3%                 |          |
| Poor hearing             | 459                                                                                   | 555                                                  | 1,014               | 54.7%                              | 1.3%                  |          |

| Variables                       | Stable or Improved<br>(care needs remained<br>the same or<br>decreased)<br>n = 35,289 | Deteriorated (care<br>needs increased)<br>n = 40,813 | Total<br>n = 76,102 | Deterioration<br>Proportion<br>(%) | % in each<br>category | P value* |
|---------------------------------|---------------------------------------------------------------------------------------|------------------------------------------------------|---------------------|------------------------------------|-----------------------|----------|
| Cannot be judged                | 85                                                                                    | 326                                                  | 411                 | 79.3%                              | 0.5%                  |          |
| Expressing intentions           |                                                                                       |                                                      |                     |                                    |                       | <0.0001  |
| Capable                         | 27,708                                                                                | 30,171                                               | 57,879              | 52.1%                              | 76.1%                 |          |
| Sometimes capable               | 5,722                                                                                 | 7,852                                                | 13,574              | 57.8%                              | 17.8%                 |          |
| Almost incapable                | 1,616                                                                                 | 2,116                                                | 3,732               | 56.7%                              | 4.9%                  |          |
| Incapable                       | 243                                                                                   | 674                                                  | 917                 | 73.5%                              | 1.2%                  |          |
| Understanding the daily routine |                                                                                       |                                                      |                     |                                    |                       | <0.0001  |
| Capable                         | 26,935                                                                                | 29,239                                               | 56,174              | 52.1%                              | 73.8%                 |          |
| Incapable                       | 8,354                                                                                 | 11,574                                               | 19,928              | 58.1%                              | 26.2%                 |          |
| Remembering birth date          |                                                                                       |                                                      |                     |                                    |                       | <0.0001  |
| Capable                         | 32,890                                                                                | 36,972                                               | 69,862              | 52.9%                              | 91.8%                 |          |
| Incapable                       | 2,399                                                                                 | 3,841                                                | 6,240               | 61.6%                              | 8.2%                  |          |
| Short-term memory               |                                                                                       |                                                      |                     |                                    |                       | <0.0001  |
| Capable                         | 23,907                                                                                | 26,807                                               | 50,714              | 52.9%                              | 66.6%                 |          |
| Incapable                       | 11,382                                                                                | 14,006                                               | 25,388              | 55.2%                              | 33.4%                 |          |
| Remembering one's name          |                                                                                       |                                                      |                     |                                    |                       | <0.0001  |
| Capable                         | 34,665                                                                                | 39,516                                               | 74,181              | 53.3%                              | 97.5%                 |          |
| Incapable                       | 624                                                                                   | 1,297                                                | 1,921               | 67.5%                              | 2.5%                  |          |
| current season                  |                                                                                       |                                                      |                     |                                    |                       | <0.0001  |

| Variables                                      | Stable or Improved<br>(care needs remained<br>the same or<br>decreased)<br>n = 35,289 | Deteriorated (care<br>needs increased)<br>n = 40,813 | Total<br>n = 76,102 | Deterioration<br>Proportion<br>(%) | % in each<br>category | P value* |
|------------------------------------------------|---------------------------------------------------------------------------------------|------------------------------------------------------|---------------------|------------------------------------|-----------------------|----------|
| Capable                                        | 29,374                                                                                | 32,331                                               | 61,705              | 52.4%                              | 81.1%                 |          |
| Incapable                                      | 5,915                                                                                 | 8,482                                                | 14,397              | 58.9%                              | 18.9%                 |          |
| Recognize places                               |                                                                                       |                                                      |                     |                                    |                       | <0.0001  |
| Capable                                        | 32,065                                                                                | 35,762                                               | 67,827              | 52.7%                              | 89.1%                 |          |
| Incapable                                      | 3,224                                                                                 | 5,051                                                | 8,275               | 61.0%                              | 10.9%                 |          |
| Conviction of being threatened                 |                                                                                       |                                                      |                     |                                    |                       | <0.0001  |
| Absent                                         | 31,412                                                                                | 35,271                                               | 66,683              | 52.9%                              | 87.6%                 |          |
| Sometimes present                              | 1,835                                                                                 | 2,366                                                | 4,201               | 56.3%                              | 5.5%                  |          |
| Present                                        | 2,042                                                                                 | 3,176                                                | 5,218               | 60.9%                              | 6.9%                  |          |
| Delusional thoughts and imaginary conversation |                                                                                       |                                                      |                     |                                    |                       | <0.0001  |
| Absent                                         | 29,704                                                                                | 33,281                                               | 62,985              | 52.8%                              | 82.8%                 |          |
| Sometimes present                              | 2,308                                                                                 | 2,887                                                | 5,195               | 55.6%                              | 6.8%                  |          |
| Present                                        | 3,277                                                                                 | 4,645                                                | 7,922               | 58.6%                              | 10.4%                 |          |
| Emotional instability                          |                                                                                       |                                                      |                     |                                    |                       | <0.0001  |
| Absent                                         | 26,978                                                                                | 30,829                                               | 57,807              | 53.3%                              | 76.0%                 |          |
| Sometimes present                              | 3,948                                                                                 | 4,568                                                | 8,516               | 53.6%                              | 11.2%                 |          |
| Present                                        | 4,363                                                                                 | 5,416                                                | 9,779               | 55.4%                              | 12.8%                 |          |
| Day–night reversal                             |                                                                                       |                                                      |                     |                                    |                       | <0.0001  |
| Absent                                         | 30,455                                                                                | 34,828                                               | 65,283              | 53.3%                              | 85.8%                 |          |

| Variables             | Stable or Improved<br>(care needs remained<br>the same or<br>decreased)<br>n = 35,289 | Deteriorated (care<br>needs increased)<br>n = 40,813 | Total<br>n = 76,102 | Deterioration<br>Proportion<br>(%) | % in each<br>category | P value* |
|-----------------------|---------------------------------------------------------------------------------------|------------------------------------------------------|---------------------|------------------------------------|-----------------------|----------|
| Sometimes present     | 2,440                                                                                 | 2,936                                                | 5,376               | 54.6%                              | 7.1%                  |          |
| Present               | 2,394                                                                                 | 3,049                                                | 5,443               | 56.0%                              | 7.2%                  |          |
| Speech repetition     |                                                                                       |                                                      |                     |                                    |                       | <0.0001  |
| Absent                | 23,960                                                                                | 26,976                                               | 50,936              | 53.0%                              | 66.9%                 |          |
| Sometimes present     | 3,653                                                                                 | 4,102                                                | 7,755               | 52.9%                              | 10.2%                 |          |
| Present               | 7,676                                                                                 | 9,735                                                | 17,411              | 55.9%                              | 22.9%                 |          |
| Screaming/Calling out |                                                                                       |                                                      |                     |                                    |                       | <0.0001  |
| Absent                | 31,584                                                                                | 35,951                                               | 67,535              | 53.2%                              | 88.7%                 |          |
| Sometimes present     | 1,894                                                                                 | 2,383                                                | 4,277               | 55.7%                              | 5.6%                  |          |
| Present               | 1,811                                                                                 | 2,479                                                | 4,290               | 57.8%                              | 5.6%                  |          |
| Resistance to care    |                                                                                       |                                                      |                     |                                    |                       | <0.0001  |
| Absent                | 30,242                                                                                | 33,641                                               | 63,883              | 52.7%                              | 83.9%                 |          |
| Sometimes present     | 2,469                                                                                 | 3,177                                                | 5,646               | 56.3%                              | 7.4%                  |          |
| Present               | 2,578                                                                                 | 3,995                                                | 6,573               | 60.8%                              | 8.6%                  |          |
| Frequent wandering    |                                                                                       |                                                      |                     |                                    |                       | <0.0001  |
| Absent                | 34,046                                                                                | 38,298                                               | 72,344              | 52.9%                              | 95.1%                 |          |
| Sometimes present     | 479                                                                                   | 887                                                  | 1,366               | 64.9%                              | 1.8%                  |          |
| Present               | 764                                                                                   | 1,628                                                | 2,392               | 68.1%                              | 3.1%                  |          |
| Restlessness          |                                                                                       |                                                      |                     |                                    |                       | <0.0001  |

| Variables                       | Stable or Improved<br>(care needs remained<br>the same or<br>decreased)<br>n = 35,289 | Deteriorated (care<br>needs increased)<br>n = 40,813 | Total<br>n = 76,102 | Deterioration<br>Proportion<br>(%) | % in each<br>category | P value* |
|---------------------------------|---------------------------------------------------------------------------------------|------------------------------------------------------|---------------------|------------------------------------|-----------------------|----------|
| Absent                          | 33,514                                                                                | 37,996                                               | 71,510              | 53.1%                              | 94.0%                 |          |
| Sometimes present               | 818                                                                                   | 1,160                                                | 1,978               | 58.6%                              | 2.6%                  |          |
| Present                         | 957                                                                                   | 1,657                                                | 2,614               | 63.4%                              | 3.4%                  |          |
| Not returning after going out   |                                                                                       |                                                      |                     |                                    |                       | <0.0001  |
| Absent                          | 34,244                                                                                | 38,805                                               | 73,049              | 53.1%                              | 96.0%                 |          |
| Sometimes present               | 446                                                                                   | 944                                                  | 1,390               | 67.9%                              | 1.8%                  |          |
| Present                         | 599                                                                                   | 1,064                                                | 1,663               | 64.0%                              | 2.2%                  |          |
| Insistence on going out alone   |                                                                                       |                                                      |                     |                                    |                       | <0.0001  |
| Absent                          | 33,970                                                                                | 38,439                                               | 72,409              | 53.1%                              | 95.1%                 |          |
| Sometimes present               | 625                                                                                   | 1,035                                                | 1,660               | 62.3%                              | 2.2%                  |          |
| Present                         | 694                                                                                   | 1,339                                                | 2,033               | 65.9%                              | 2.7%                  |          |
| Hoarding behavior               |                                                                                       |                                                      |                     |                                    |                       | <0.0001  |
| Absent                          | 34,130                                                                                | 38,892                                               | 73,022              | 53.3%                              | 96.0%                 |          |
| Sometimes present               | 350                                                                                   | 587                                                  | 937                 | 62.6%                              | 1.2%                  |          |
| Present                         | 809                                                                                   | 1,334                                                | 2,143               | 62.2%                              | 2.8%                  |          |
| Destroying objects and clothing |                                                                                       |                                                      |                     |                                    |                       | <0.0001  |
| Absent                          | 34,839                                                                                | 40,015                                               | 74,854              | 53.5%                              | 98.4%                 |          |
| Sometimes present               | 234                                                                                   | 412                                                  | 646                 | 63.8%                              | 0.8%                  |          |
| Present                         | 216                                                                                   | 386                                                  | 602                 | 64.1%                              | 0.8%                  |          |

| Variables                               | Stable or Improved<br>(care needs remained<br>the same or<br>decreased)<br>n = 35,289 | Deteriorated (care<br>needs increased)<br>n = 40,813 | Total<br>n = 76,102 | Deterioration<br>Proportion<br>(%) | % in each<br>category | P value* |
|-----------------------------------------|---------------------------------------------------------------------------------------|------------------------------------------------------|---------------------|------------------------------------|-----------------------|----------|
| Movement                                |                                                                                       |                                                      |                     |                                    |                       | <0.0001  |
| Independent                             | 17,281                                                                                | 23,284                                               | 40,565              | 57.4%                              | 53.3%                 |          |
| Needs supervision                       | 7,892                                                                                 | 9,782                                                | 17,674              | 55.3%                              | 23.2%                 |          |
| Partial assistance                      | 5,667                                                                                 | 4,286                                                | 9,953               | 43.1%                              | 13.1%                 |          |
| Fully assisted                          | 4,449                                                                                 | 3,461                                                | 7,910               | 43.8%                              | 10.4%                 |          |
| Passing urine/Urination                 |                                                                                       |                                                      |                     |                                    |                       | <0.0001  |
| Independent                             | 20,617                                                                                | 25,710                                               | 46,327              | 55.5%                              | 60.9%                 |          |
| Needs supervision                       | 2,192                                                                                 | 3,212                                                | 5,404               | 59.4%                              | 7.1%                  |          |
| Partial assistance                      | 7,428                                                                                 | 7,679                                                | 15,107              | 50.8%                              | 19.9%                 |          |
| Fully assisted                          | 5,052                                                                                 | 4,212                                                | 9,264               | 45.5%                              | 12.2%                 |          |
| Passing motion/Defecation               |                                                                                       |                                                      |                     |                                    |                       | <0.0001  |
| Independent                             | 21,658                                                                                | 27,468                                               | 49,126              | 55.9%                              | 64.6%                 |          |
| Needs supervision                       | 1,975                                                                                 | 3,029                                                | 5,004               | 60.5%                              | 6.6%                  |          |
| Partial assistance                      | 6,465                                                                                 | 6,017                                                | 12,482              | 48.2%                              | 16.4%                 |          |
| Fully assisted                          | 5,191                                                                                 | 4,299                                                | 9,490               | 45.3%                              | 12.5%                 |          |
| Everyday decision-making                |                                                                                       |                                                      |                     |                                    |                       | <0.0001  |
| Capable                                 | 12,221                                                                                | 13,789                                               | 26,010              | 53.0%                              | 34.2%                 |          |
| Capable except during special occasions | 16,855                                                                                | 18,017                                               | 34,872              | 51.7%                              | 45.8%                 |          |
| Capable but very challenging            | 5,314                                                                                 | 7,423                                                | 12,737              | 58.3%                              | 16.7%                 |          |



| Variables                     | Stable or Improved<br>(care needs remained<br>the same or<br>decreased)<br>n = 35,289 | Deteriorated (care<br>needs increased)<br>n = 40,813 | Total<br>n = 76,102 | Deterioration<br>Proportion<br>(%) | % in each<br>category | P value* |
|-------------------------------|---------------------------------------------------------------------------------------|------------------------------------------------------|---------------------|------------------------------------|-----------------------|----------|
| Incapable                     | 899                                                                                   | 1,584                                                | 2,483               | 63.8%                              | 3.3%                  |          |
| Forgetfulness                 |                                                                                       |                                                      |                     |                                    |                       | <0.0001  |
| Absent                        | 18,446                                                                                | 19,587                                               | 38,033              | 51.5%                              | 50.0%                 |          |
| Sometimes present             | 6,553                                                                                 | 7,699                                                | 14,252              | 54.0%                              | 18.7%                 |          |
| Present                       | 10,290                                                                                | 13,527                                               | 23,817              | 56.8%                              | 31.3%                 |          |
| Frequency of going out        |                                                                                       |                                                      |                     |                                    |                       | <0.0001  |
| More than once a week         | 19,802                                                                                | 22,323                                               | 42,125              | 53.0%                              | 55.4%                 |          |
| More than once a month        | 6,039                                                                                 | 7,625                                                | 13,664              | 55.8%                              | 18.0%                 |          |
| Less than once a month        | 9,448                                                                                 | 10,865                                               | 20,313              | 53.5%                              | 26.7%                 |          |
| Self-talk/Laughing to oneself |                                                                                       |                                                      |                     |                                    |                       | <0.0001  |
| Absent                        | 32,938                                                                                | 37,637                                               | 70,575              | 53.3%                              | 92.7%                 |          |
| Sometimes present             | 880                                                                                   | 1,102                                                | 1,982               | 55.6%                              | 2.6%                  |          |
| Present                       | 1,471                                                                                 | 2,074                                                | 3,545               | 58.5%                              | 4.7%                  |          |
| Selfish behaviors             |                                                                                       |                                                      |                     |                                    |                       | <0.0001  |
| Absent                        | 31,122                                                                                | 35,095                                               | 66,217              | 53.0%                              | 87.0%                 |          |
| Sometimes present             | 1,918                                                                                 | 2,379                                                | 4,297               | 55.4%                              | 5.6%                  |          |
| Present                       | 2,249                                                                                 | 3,339                                                | 5,588               | 59.8%                              | 7.3%                  |          |
| Disorganized talking          |                                                                                       |                                                      |                     |                                    |                       | <0.0001  |
| Absent                        | 27,869                                                                                | 31,039                                               | 58,908              | 52.7%                              | 77.4%                 |          |

| Variables                          | Stable or Improved<br>(care needs remained<br>the same or<br>decreased)<br>n = 35,289 | Deteriorated (care<br>needs increased)<br>n = 40,813 | Total<br>n = 76,102 | Deterioration<br>Proportion<br>(%) | % in each<br>category | P value* |
|------------------------------------|---------------------------------------------------------------------------------------|------------------------------------------------------|---------------------|------------------------------------|-----------------------|----------|
| Sometimes present                  | 3,322                                                                                 | 4,069                                                | 7,391               | 55.1%                              | 9.7%                  |          |
| Present                            | 4,098                                                                                 | 5,705                                                | 9,803               | 58.2%                              | 12.9%                 |          |
| Not fitting in a group             |                                                                                       |                                                      |                     |                                    |                       | <0.0001  |
| Absent                             | 32,789                                                                                | 37,536                                               | 70,325              | 53.4%                              | 92.4%                 |          |
| Sometimes present                  | 1,160                                                                                 | 1,501                                                | 2,661               | 56.4%                              | 3.5%                  |          |
| Present                            | 1,340                                                                                 | 1,776                                                | 3,116               | 57.0%                              | 4.1%                  |          |
| Shopping                           |                                                                                       |                                                      |                     |                                    |                       | <0.0001  |
| Independent                        | 5,586                                                                                 | 5,549                                                | 11,135              | 49.8%                              | 14.6%                 |          |
| Needs supervision                  | 369                                                                                   | 385                                                  | 754                 | 51.1%                              | 1.0%                  |          |
| Partial assistance                 | 7,777                                                                                 | 9,245                                                | 17,022              | 54.3%                              | 22.4%                 |          |
| Fully assisted                     | 21,557                                                                                | 25,634                                               | 47,191              | 54.3%                              | 62.0%                 |          |
| Cooking                            |                                                                                       |                                                      |                     |                                    |                       | <0.0001  |
| Independent                        | 9,788                                                                                 | 10,502                                               | 20,290              | 51.8%                              | 26.7%                 |          |
| Needs supervision                  | 527                                                                                   | 679                                                  | 1,206               | 56.3%                              | 1.6%                  |          |
| Partial assistance                 | 3,278                                                                                 | 4,241                                                | 7,519               | 56.4%                              | 9.9%                  |          |
| Fully assisted                     | 21,696                                                                                | 25,391                                               | 47,087              | 53.9%                              | 61.9%                 |          |
| BPSD_visual/auditory hallucination |                                                                                       |                                                      |                     |                                    |                       | <0.0001  |
| No                                 | 34,530                                                                                | 39,642                                               | 74,172              | 53.4%                              | 97.5%                 |          |
| Yes                                | 759                                                                                   | 1,171                                                | 1,930               | 60.7%                              | 2.5%                  |          |

| Variables                   | Stable or Improved<br>(care needs remained<br>the same or<br>decreased)<br>n = 35,289 | Deteriorated (care<br>needs increased)<br>n = 40,813 | Total<br>n = 76,102 | Deterioration<br>Proportion<br>(%) | % in each<br>category | P value* |
|-----------------------------|---------------------------------------------------------------------------------------|------------------------------------------------------|---------------------|------------------------------------|-----------------------|----------|
| BPSD_ Delusions             |                                                                                       |                                                      |                     |                                    |                       | <0.0001  |
| No                          | 33,942                                                                                | 38,683                                               | 72,625              | 53.3%                              | 95.4%                 |          |
| Yes                         | 1,347                                                                                 | 2,130                                                | 3,477               | 61.3%                              | 4.6%                  |          |
| BPSD_ Day-night reversal    |                                                                                       |                                                      |                     |                                    |                       | <0.0001  |
| No                          | 34,586                                                                                | 39,671                                               | 74,257              | 53.4%                              | 97.6%                 |          |
| Yes                         | 703                                                                                   | 1,142                                                | 1,845               | 61.9%                              | 2.4%                  |          |
| BPSD_ Violent language      |                                                                                       |                                                      |                     |                                    |                       | <0.0001  |
| No                          | 34,743                                                                                | 39,828                                               | 74,571              | 53.4%                              | 98.0%                 |          |
| Yes                         | 546                                                                                   | 985                                                  | 1,531               | 64.3%                              | 2.0%                  |          |
| BPSD_ Assaulting            |                                                                                       |                                                      |                     |                                    |                       | <0.0001  |
| No                          | 35,114                                                                                | 40,480                                               | 75,594              | 53.5%                              | 99.3%                 |          |
| Yes                         | 175                                                                                   | 333                                                  | 508                 | 65.6%                              | 0.7%                  |          |
| BPSD_ Refusal to care       |                                                                                       |                                                      |                     |                                    |                       | <0.0001  |
| No                          | 34,496                                                                                | 39,444                                               | 73,940              | 53.3%                              | 97.2%                 |          |
| Yes                         | 793                                                                                   | 1,369                                                | 2,162               | 63.3%                              | 2.8%                  |          |
| BPSD_ Wandering             |                                                                                       |                                                      |                     |                                    |                       | <0.0001  |
| No                          | 34,823                                                                                | 39,891                                               | 74,714              | 53.4%                              | 98.2%                 |          |
| Yes                         | 466                                                                                   | 922                                                  | 1,388               | 66.4%                              | 1.8%                  |          |
| BPSD_ Mismanagement of fire |                                                                                       |                                                      |                     |                                    |                       | <0.0001  |

| Variables                    | Stable or Improved<br>(care needs remained<br>the same or<br>decreased)<br>n = 35,289 | Deteriorated (care<br>needs increased)<br>n = 40,813 | Total<br>n = 76,102 | Deterioration<br>Proportion<br>(%) | % in each<br>category | P value* |
|------------------------------|---------------------------------------------------------------------------------------|------------------------------------------------------|---------------------|------------------------------------|-----------------------|----------|
| No                           | 34,915                                                                                | 39,961                                               | 74,876              | 53.4%                              | 98.4%                 |          |
| Yes                          | 374                                                                                   | 852                                                  | 1,226               | 69.5%                              | 1.6%                  |          |
| BPSD_ Filthy behaviors       |                                                                                       |                                                      |                     |                                    |                       | <0.0001  |
| No                           | 35,028                                                                                | 40,359                                               | 75,387              | 53.5%                              | 99.1%                 |          |
| Yes                          | 261                                                                                   | 454                                                  | 715                 | 63.5%                              | 0.9%                  |          |
| BPSD_ Pica behaviors         |                                                                                       |                                                      |                     |                                    |                       | 0.084    |
| No                           | 35,227                                                                                | 40,718                                               | 75,945              | 53.6%                              | 99.8%                 |          |
| Yes                          | 62                                                                                    | 95                                                   | 157                 | 60.5%                              | 0.2%                  |          |
| BPSD_ Sexual disinhibition   |                                                                                       |                                                      |                     |                                    |                       | 0.792    |
| No                           | 35,274                                                                                | 40,794                                               | 76,068              | 53.6%                              | 100.0%                |          |
| Yes                          | 15                                                                                    | 19                                                   | 34                  | 55.9%                              | 0.0%                  |          |
| BPSD_ Others                 |                                                                                       |                                                      |                     |                                    |                       | <0.0001  |
| No                           | 34,576                                                                                | 39,813                                               | 74,389              | 53.5%                              | 97.7%                 |          |
| Yes                          | 713                                                                                   | 1,000                                                | 1,713               | 58.4%                              | 2.3%                  |          |
| No paralysis in limbs        |                                                                                       |                                                      |                     |                                    |                       | <0.0001  |
| No                           | 24,377                                                                                | 26,676                                               | 51,053              | 52.3%                              | 67.1%                 |          |
| Yes                          | 10,912                                                                                | 14,137                                               | 25,049              | 56.4%                              | 32.9%                 |          |
| Paralysis in left upper limb |                                                                                       |                                                      |                     |                                    |                       | <0.0001  |
| No                           | 30,832                                                                                | 36,628                                               | 67,460              | 54.3%                              | 88.6%                 |          |

| Variables                           | Stable or Improved<br>(care needs remained<br>the same or<br>decreased)<br>n = 35,289 | Deteriorated (care<br>needs increased)<br>n = 40,813 | Total<br>n = 76,102 | Deterioration<br>Proportion<br>(%) | % in each<br>category | P value* |
|-------------------------------------|---------------------------------------------------------------------------------------|------------------------------------------------------|---------------------|------------------------------------|-----------------------|----------|
| Yes                                 | 4,457                                                                                 | 4,185                                                | 8,642               | 48.4%                              | 11.4%                 |          |
| Paralysis in right upper limb       |                                                                                       |                                                      |                     |                                    |                       | <0.0001  |
| No                                  | 30,363                                                                                | 36,113                                               | 66,476              | 54.3%                              | 87.4%                 |          |
| Yes                                 | 4,926                                                                                 | 4,700                                                | 9,626               | 48.8%                              | 12.6%                 |          |
| Paralysis in left lower limb        |                                                                                       |                                                      |                     |                                    |                       | <0.0001  |
| No                                  | 14,736                                                                                | 17,590                                               | 32,326              | 54.4%                              | 42.5%                 |          |
| Yes                                 | 20,553                                                                                | 23,223                                               | 43,776              | 53.0%                              | 57.5%                 |          |
| Paralysis in right lower limb       |                                                                                       |                                                      |                     |                                    |                       | 0.014    |
| No                                  | 14,950                                                                                | 17,652                                               | 32,602              | 54.1%                              | 42.8%                 |          |
| Yes                                 | 20,339                                                                                | 23,161                                               | 43,500              | 53.2%                              | 57.2%                 |          |
| Paralysis outside limbs             |                                                                                       |                                                      |                     |                                    |                       | <0.0001  |
| No                                  | 31,478                                                                                | 37,246                                               | 68,724              | 54.2%                              | 90.3%                 |          |
| Yes                                 | 3,811                                                                                 | 3,567                                                | 7,378               | 48.3%                              | 9.7%                  |          |
| Joint movement without restriction  |                                                                                       |                                                      |                     |                                    |                       | <0.0001  |
| No                                  | 19,301                                                                                | 19,050                                               | 38,351              | 49.7%                              | 50.4%                 |          |
| Yes                                 | 15,988                                                                                | 21,763                                               | 37,751              | 57.6%                              | 49.6%                 |          |
| Shoulder joint movement restriction |                                                                                       |                                                      |                     |                                    |                       | <0.0001  |
| No                                  | 29,180                                                                                | 35,623                                               | 64,803              | 55.0%                              | 85.2%                 |          |
| Yes                                 | 6,109                                                                                 | 5,190                                                | 11,299              | 45.9%                              | 14.8%                 |          |

| Variables                                                               | Stable or Improved<br>(care needs remained<br>the same or<br>decreased)<br>n = 35,289 | Deteriorated (care<br>needs increased)<br>n = 40,813 | Total<br>n = 76,102 | Deterioration<br>Proportion<br>(%) | % in each<br>category | P value* |
|-------------------------------------------------------------------------|---------------------------------------------------------------------------------------|------------------------------------------------------|---------------------|------------------------------------|-----------------------|----------|
| <b>Hip joint movement restriction</b>                                   |                                                                                       |                                                      |                     |                                    |                       | <0.0001  |
| No                                                                      | 31,488                                                                                | 37,388                                               | 68,876              | 54.3%                              | 90.5%                 |          |
| Yes                                                                     | 3,801                                                                                 | 3,425                                                | 7,226               | 47.4%                              | 9.5%                  |          |
| <b>Knee joint movement restriction</b>                                  |                                                                                       |                                                      |                     |                                    |                       | <0.0001  |
| No                                                                      | 24,019                                                                                | 29,199                                               | 53,218              | 54.9%                              | 69.9%                 |          |
| Yes                                                                     | 11,270                                                                                | 11,614                                               | 22,884              | 50.8%                              | 30.1%                 |          |
| <b>Other joint movement restriction</b>                                 |                                                                                       |                                                      |                     |                                    |                       | <0.0001  |
| No                                                                      | 26,891                                                                                | 32,369                                               | 59,260              | 54.6%                              | 77.9%                 |          |
| Yes                                                                     | 8,398                                                                                 | 8,444                                                | 16,842              | 50.1%                              | 22.1%                 |          |
| <b>Medical treatment in the last 2 weeks_Intravenous therapy</b>        |                                                                                       |                                                      |                     |                                    |                       | <0.0001  |
| No                                                                      | 34,348                                                                                | 40,002                                               | 74,350              | 53.8%                              | 97.7%                 |          |
| Yes                                                                     | 941                                                                                   | 811                                                  | 1,752               | 46.3%                              | 2.3%                  |          |
| <b>Medical treatment in the last 2 weeks_Total parenteral nutrition</b> |                                                                                       |                                                      |                     |                                    |                       | 0.001    |
| No                                                                      | 35,252                                                                                | 40,731                                               | 75,983              | 53.6%                              | 99.8%                 |          |
| Yes                                                                     | 37                                                                                    | 82                                                   | 119                 | 68.9%                              | 0.2%                  |          |
| <b>Medical treatment in the last 2 weeks_Dialysis</b>                   |                                                                                       |                                                      |                     |                                    |                       | <0.0001  |
| No                                                                      | 34,840                                                                                | 40,410                                               | 75,250              | 53.7%                              | 98.9%                 |          |
| Yes                                                                     | 449                                                                                   | 403                                                  | 852                 | 47.3%                              | 1.1%                  |          |
| <b>Medical treatment in the last 2 weeks_Stoma</b>                      |                                                                                       |                                                      |                     |                                    |                       |          |

| Variables                                                   | Stable or Improved<br>(care needs remained<br>the same or<br>decreased)<br>n = 35,289 | Deteriorated (care<br>needs increased)<br>n = 40,813 | Total<br>n = 76,102 | Deterioration<br>Proportion<br>(%) | % in each<br>category | P value* |
|-------------------------------------------------------------|---------------------------------------------------------------------------------------|------------------------------------------------------|---------------------|------------------------------------|-----------------------|----------|
| No                                                          | 35,070                                                                                | 40,631                                               | 75,701              | 53.7%                              | 99.5%                 |          |
| Yes                                                         | 219                                                                                   | 182                                                  | 401                 | 45.4%                              | 0.5%                  |          |
| Medical treatment in the last 2 weeks_Oxygen therapy        |                                                                                       |                                                      |                     |                                    |                       | 0.001    |
| No                                                          | 34,683                                                                                | 39,982                                               | 74,665              | 53.5%                              | 98.1%                 |          |
| Yes                                                         | 606                                                                                   | 831                                                  | 1,437               | 57.8%                              | 1.9%                  |          |
| Medical treatment in the last 2 weeks_Artificial respirator |                                                                                       |                                                      |                     |                                    |                       | 0.345    |
| No                                                          | 35,273                                                                                | 40,788                                               | 76,061              | 53.6%                              | 99.9%                 |          |
| Yes                                                         | 16                                                                                    | 25                                                   | 41                  | 61.0%                              | 0.1%                  |          |
| Medical treatment in the last 2 weeks_Tracheostomy          |                                                                                       |                                                      |                     |                                    |                       | <0.0001  |
| No                                                          | 35,262                                                                                | 40,745                                               | 76,007              | 53.6%                              | 99.9%                 |          |
| Yes                                                         | 27                                                                                    | 68                                                   | 95                  | 71.6%                              | 0.1%                  |          |
| Medical treatment in the last 2 weeks_Pain care             |                                                                                       |                                                      |                     |                                    |                       | 0.009    |
| No                                                          | 35,065                                                                                | 40,488                                               | 75,553              | 53.6%                              | 99.3%                 |          |
| Yes                                                         | 224                                                                                   | 325                                                  | 549                 | 59.2%                              | 0.7%                  |          |
| Medical treatment in the last 2 weeks_Tube feeding          |                                                                                       |                                                      |                     |                                    |                       | <0.0001  |
| No                                                          | 35,108                                                                                | 40,151                                               | 75,259              | 53.4%                              | 98.9%                 |          |
| Yes                                                         | 181                                                                                   | 662                                                  | 843                 | 78.5%                              | 1.1%                  |          |
| Medical treatment in the last 2 weeks_Vital sign monitor    |                                                                                       |                                                      |                     |                                    |                       | <0.0001  |
| No                                                          | 35,020                                                                                | 40,619                                               | 75,639              | 53.7%                              | 99.4%                 |          |

| Variables                                               | Stable or Improved<br>(care needs remained<br>the same or<br>decreased)<br>n = 35,289 | Deteriorated (care<br>needs increased)<br>n = 40,813 | Total<br>n = 76,102 | Deterioration<br>Proportion<br>(%) | % in each<br>category | P value* |
|---------------------------------------------------------|---------------------------------------------------------------------------------------|------------------------------------------------------|---------------------|------------------------------------|-----------------------|----------|
| Yes                                                     | 269                                                                                   | 194                                                  | 463                 | 41.9%                              | 0.6%                  |          |
| Medical treatment in the last 2 weeks_Bedsore treatment |                                                                                       |                                                      |                     |                                    |                       | 0.001    |
| No                                                      | 34,960                                                                                | 40,521                                               | 75,481              | 53.7%                              | 99.2%                 |          |
| Yes                                                     | 329                                                                                   | 292                                                  | 621                 | 47.0%                              | 0.8%                  |          |
| Medical treatment in the last 2 weeks_Catheter          |                                                                                       |                                                      |                     |                                    |                       | <0.0001  |
| No                                                      | 34,600                                                                                | 40,301                                               | 74,901              | 53.8%                              | 98.4%                 |          |
| Yes                                                     | 689                                                                                   | 512                                                  | 1,201               | 42.6%                              | 1.6%                  |          |

\*  $p$  values are two-tailed and are considered to be statistically significant when  $< 0.005$ .

Results are after conducting a descriptive analysis of the presence or absence of care needs increases of the total study sample and the sub subgroup. We also conducted a single regression model to identify variables that were statistically significant with  $p$  value  $< 0.05$  and area under ROC curve  $\geq 0.53$ . None of the variables extracted from the long-term care insurance claim data were statistically significant. We used the selected variables to establish our multivariable binary logistic regression model.



Table A.2. Results of Multivariable Logistic Regression Model of All Care Needs Increases (AUC:0.7143).

| Variables                                                        | Odds Ratio<br>(95% Confidence<br>Interval) | P<br>Value |
|------------------------------------------------------------------|--------------------------------------------|------------|
| Sex                                                              |                                            |            |
| Female                                                           | Ref                                        |            |
| Male                                                             | 1.22 (1.17–1.26)                           | <0.05      |
| Care needs level of 1st judgment                                 |                                            |            |
| Care needs level 1                                               | Ref                                        |            |
| Unqualified                                                      | 187 (114–308)                              | <0.05      |
| Support required Level 1                                         | 2.78 (2.62–2.95)                           | <0.05      |
| Support required Level 2                                         | 1.66 (1.58–1.76)                           | <0.05      |
| Care needs level 2                                               | 0.3 (0.28–0.32)                            | <0.05      |
| Care needs level 3                                               | 0.11 (0.1–0.13)                            | <0.05      |
| Care needs level 4                                               | 0.03 (0.02–0.03)                           | <0.05      |
| Degree of independent living for elderly with disability         |                                            |            |
| A 2 (rarely goes out and naps several times during daytime)      | Ref                                        |            |
| Dependent                                                        | 0.38 (0.30–0.48)                           | <0.05      |
| J 1 (able to go out using public transportation)                 | 0.41 (0.38–0.44)                           | <0.05      |
| J 2 (able to go out but only within the neighborhood)            | 0.57 (0.54–0.60)                           | <0.05      |
| A 1 (goes out with assistance and usually not bedridden)         | 0.84 (0.81–0.88)                           | <0.05      |
| B 1 (able to eat and use toilet away from bed using wheel chair) | 1.14 (1.06–1.21)                           | <0.05      |
| B 2 (requires assistance to get onto a wheelchair)               | 1.17 (1.07–1.29)                           | <0.05      |
| C 1 (able to roll over by him/herself)                           | 1.66 (1.43–1.93)                           | <0.05      |
| C 2 (fully assisted in rolling over by him/herself)              | 1.75 (1.45–2.12)                           | <0.05      |
| Cognitive ability (daily decision-making)                        |                                            |            |
| Loss                                                             | Ref                                        |            |
| Unknown                                                          | 0.30 (0.04–2.50)                           | 0.268      |
| Independent                                                      | 1.07 (1.03–1.11)                           | <0.05      |
| Some difficulty                                                  | 1.36 (1.28–1.45)                           | <0.05      |
| Partially assisted                                               | 1.49 (1.36–1.63)                           | <0.05      |
| Fully assisted                                                   | 1.48 (1.29–1.70)                           | <0.05      |
| Communication ability                                            |                                            |            |
| Capable                                                          | Ref                                        |            |
| Unknown                                                          | 1.16 (0.18–7.65)                           | 0.878      |

| Variables                        | Odds Ratio<br>(95% Confidence<br>Interval) | P<br>Value |
|----------------------------------|--------------------------------------------|------------|
| Somewhat challenging             | 0.99 (0.93–1.06)                           | 0.743      |
| Limited to specific requirements | 0.99 (0.89–1.09)                           | 0.792      |
| Incapable                        | 1.03 (0.86–1.23)                           | 0.747      |
| Turn in bed                      |                                            |            |
| Can do holding railings          | Ref                                        |            |
| Independent                      | 1.11 (1.07–1.16)                           | <0.05      |
| Fully assisted                   | 1.10 (1.02–1.18)                           | <0.05      |
| Get up                           |                                            |            |
| Can do holding railings          | Ref                                        |            |
| Independent                      | 1.06 (1.00–1.13)                           | 0.052      |
| Fully assisted                   | 1.36 (1.25–1.47)                           | <0.05      |
| Stand on both feet               |                                            |            |
| Independent                      | Ref                                        |            |
| Partially assisted               | 1.11 (1.06–1.16)                           | <0.05      |
| Fully assisted                   | 1.11 (1.00–1.25)                           | 0.057      |
| Walk                             |                                            |            |
| Can do with assistive technology | Ref                                        |            |
| Independent                      | 0.87 (0.83–0.92)                           | <0.05      |
| Fully assisted                   | 1.08 (1.01–1.16)                           | <0.05      |
| Transfer                         |                                            |            |
| Independent                      | Ref                                        |            |
| Needs supervision                | 0.97 (0.92–1.03)                           | 0.328      |
| Partially assisted               | 1.04 (0.96–1.13)                           | 0.367      |
| Fully assisted                   | 0.98 (0.85–1.14)                           | 0.835      |
| Stand up                         |                                            |            |
| Can do holding railings          | Ref                                        |            |
| Independent                      | 1.39 (1.26–1.53)                           | <0.05      |
| Fully assisted                   | 1.14 (1.03–1.26)                           | <0.05      |
| Stand on one foot                |                                            |            |
| Partially assisted               | Ref                                        |            |
| Independent                      | 1.03 (0.95–1.11)                           | 0.505      |
| Fully assisted                   | 1.06 (1.01–1.11)                           | <0.05      |
| Swallowing                       |                                            |            |

| Variables                       | Odds Ratio<br>(95% Confidence<br>Interval) | P<br>Value |
|---------------------------------|--------------------------------------------|------------|
| Independent                     | Ref                                        |            |
| Needs supervision               | 0.96 (0.92–1.00)                           | <0.05      |
| Fully assisted                  | 3.10 (2.48–3.88)                           | <0.05      |
| Washing face                    |                                            |            |
| Independent                     | Ref                                        |            |
| Partially assisted              | 1.11 (1.06–1.18)                           | <0.05      |
| Fully assisted                  | 1.32 (1.19–1.46)                           | <0.05      |
| Putting on/removing top         |                                            |            |
| Independent                     | Ref                                        |            |
| Needs supervision               | 1.30 (1.19–1.43)                           | <0.05      |
| Partially assisted              | 1.44 (1.33–1.55)                           | <0.05      |
| Fully assisted                  | 1.65 (1.46–1.87)                           | <0.05      |
| Putting on/removing pants       |                                            |            |
| Independent                     | Ref                                        |            |
| Needs supervision               | 0.97 (0.88–1.06)                           | 0.487      |
| Partially assisted              | 0.99 (0.91–1.07)                           | 0.812      |
| Fully assisted                  | 1.08 (0.96–1.22)                           | 0.21       |
| Expressing intentions           |                                            |            |
| Capable                         | Ref                                        |            |
| Sometimes capable               | 1.26 (1.19–1.32)                           | <0.05      |
| Almost incapable                | 1.40 (1.27–1.54)                           | <0.05      |
| Incapable                       | 1.78 (1.45–2.18)                           | <0.05      |
| Understanding the daily routine |                                            |            |
| Capable                         | Ref                                        |            |
| Incapable                       | 1.29 (1.22–1.36)                           | <0.05      |
| Remembering birth date          |                                            |            |
| Capable                         | Ref                                        |            |
| Incapable                       | 1.18 (1.11–1.25)                           | <0.05      |
| Recognize places                |                                            |            |
| Capable                         | Ref                                        |            |
| Incapable                       | 1.21 (1.12–1.30)                           | <0.05      |
| Conviction of being threatened  |                                            |            |
| Absent                          | Ref                                        |            |

| Variables                                                          | Odds Ratio<br>(95% Confidence<br>Interval) | P<br>Value |
|--------------------------------------------------------------------|--------------------------------------------|------------|
| Sometimes absent                                                   | 1.27 (1.19–1.35)                           | <0.05      |
| Present                                                            | 1.45 (1.36–1.54)                           | <0.05      |
| <b>Movement</b>                                                    |                                            |            |
| Independent                                                        | Ref                                        |            |
| Needs supervision                                                  | 1.13 (1.07–1.19)                           | <0.05      |
| Partial assistance                                                 | 1.27 (1.18–1.37)                           | <0.05      |
| Fully assisted                                                     | 1.15 (1.03–1.28)                           | <0.05      |
| <b>Pass motion/Defecation</b>                                      |                                            |            |
| Independent                                                        | Ref                                        |            |
| Needs supervision                                                  | 1.32 (1.23–1.42)                           | <0.05      |
| Partial assistance                                                 | 1.64 (1.53–1.76)                           | <0.05      |
| Fully assisted                                                     | 1.78 (1.60–1.97)                           | <0.05      |
| <b>Disorganized talking</b>                                        |                                            |            |
| Absent                                                             | Ref                                        |            |
| Sometimes absent                                                   | 1.25 (1.19–1.32)                           | <0.05      |
| Present                                                            | 1.25 (1.18–1.32)                           | <0.05      |
| <b>No paralysis in limbs</b>                                       |                                            |            |
| No                                                                 | Ref                                        |            |
| Yes                                                                | 0.85 (0.81–0.88)                           | <0.05      |
| <b>Joint movement without restriction</b>                          |                                            |            |
| No                                                                 | Ref                                        |            |
| Yes                                                                | 1.19 (1.15–1.23)                           | <0.05      |
| <b>Shoulder joint movement restriction</b>                         |                                            |            |
| No                                                                 | Ref                                        |            |
| Yes                                                                | 0.98 (0.94–1.03)                           | 0.541      |
| Care needs certification reference time_Dementia addition (minute) | 1.01 (1.01–1.01)                           | <0.05      |
