# Supplementary material for: Development and validation of gradient boosting decision tree models for predicting care needs using a long-term care database in Japan
Source: bioRxiv or medRxiv preprint supplement (doi:10.1101/2021.01.20.21250146), 2021-01-26
Supplement: Supplementary file [file media-2.pdf]

## Appendix B

Outcomes of the machine learning models with four care needs level (CNL) categories (declined needs and benefit loss as one group, support required levels 1 and 2 into one group, CNL 1–3 as one group, and CNL 4–5 to another group) and nine CNL categories (the original CNL, benefit loss, and declined needs).

Table B.1. Labels of Classification Models.

| # of labels | Label description                                                                                                                                                                                                                            |
|-------------|----------------------------------------------------------------------------------------------------------------------------------------------------------------------------------------------------------------------------------------------|
| 4           | 0: Declined needs; Loss of benefits<br>1: Support required level 1–2<br>2: Care needs level 1–3<br>3: Care needs level 4–5                                                                                                                   |
| 9           | 00: Declined needs<br>10: Loss of benefits<br>12: Support required level 1<br>13: Support required level 2<br>21: Care needs level 1<br>22: Care needs level 2<br>23: Care needs level 3<br>24: Care needs level 4<br>25: Care needs level 5 |

Table B.2. Demographic Characteristics and Chi-square or Fisher's Exact Test Result of Numbers of Stable or Improved and Deteriorated Groups.

| Features                              | Level                    | Missing | Stable or Improved<br>(care needs remained the same or decreased)<br>n = 18,659 | Deteriorated<br>(care needs increased)<br>n = 11,728 | Total<br>N = 30,387 | Deterioration<br>Proportion<br>(%) | % in each<br>category | P value |
|---------------------------------------|--------------------------|---------|---------------------------------------------------------------------------------|------------------------------------------------------|---------------------|------------------------------------|-----------------------|---------|
| Living arrangement                    | Unknown                  | 0       | 1                                                                               | 0                                                    | 1                   | 0.00%                              | 0.00%                 | <0.001  |
|                                       | Home                     |         | 17,785                                                                          | 11,370                                               | 29,155              | 39.00%                             | 95.90%                |         |
|                                       | facility                 |         | 873                                                                             | 358                                                  | 1,231               | 29.10%                             | 4.10%                 |         |
| Signs of elderly people with dementia | None                     | 0       | 18,659                                                                          | 11,728                                               | 30,387              | 38.60%                             | 100.00%               | 1       |
| Applicant type                        | 1st insured              | 0       | 18,658                                                                          | 11,728                                               | 30,386              | 38.60%                             | 100.00%               | 1       |
|                                       | 2nd insured              |         | 1                                                                               |                                                      | 1                   | 0.00%                              | 0.00%                 |         |
| Sex                                   | Male                     | 0       | 5,993                                                                           | 2,517                                                | 8,510               | 29.60%                             | 28.00%                | <0.001  |
|                                       | Female                   |         | 12,666                                                                          | 9,211                                                | 21,877              | 42.10%                             | 72.00%                |         |
| Care needs level_1st judgment         | Unqualified              | 0       | 223                                                                             | 207                                                  | 430                 | 48.10%                             | 1.40%                 | <0.001  |
|                                       | Support required level 1 |         | 2,315                                                                           | 2,106                                                | 4,421               | 47.60%                             | 14.50%                |         |
|                                       | Support required level 2 |         | 2,464                                                                           | 2,487                                                | 4,951               | 50.20%                             | 16.30%                |         |
|                                       | Care needs level 1       |         | 2,973                                                                           | 2,459                                                | 5,432               | 45.30%                             | 17.90%                |         |
|                                       | Care needs level 2       |         | 3,137                                                                           | 2,036                                                | 5,173               | 39.40%                             | 17.00%                |         |
|                                       | Care needs level 3       |         | 2,025                                                                           | 1,071                                                | 3,096               | 34.60%                             | 10.20%                |         |
|                                       | Care needs level 4       |         | 2,722                                                                           | 890                                                  | 3,612               | 24.60%                             | 11.90%                |         |
|                                       | Care needs level 5       |         | 2,800                                                                           | 472                                                  | 3,272               | 14.40%                             | 10.80%                |         |

| Features                               | Level                    | Missing | Stable or Improved<br>(care needs remained the same or decreased)<br>n = 18,659 | Deteriorated<br>(care needs increased)<br>n = 11,728 | Total<br>N = 30,387 | Deterioration<br>Proportion<br>(%) | % in each<br>category | P value |
|----------------------------------------|--------------------------|---------|---------------------------------------------------------------------------------|------------------------------------------------------|---------------------|------------------------------------|-----------------------|---------|
| Care needs level_2nd judgment          | Unqualified              | 0       | 26                                                                              | 35                                                   | 61                  | 57.40%                             | 0.20%                 | <0.001  |
|                                        | Support required level 1 |         | 2046                                                                            | 1,892                                                | 3,938               | 48.00%                             | 13.00%                |         |
|                                        | Support required level 2 |         | 2,115                                                                           | 2,131                                                | 4,246               | 50.20%                             | 14.00%                |         |
|                                        | Care needs level 1       |         | 2,921                                                                           | 2,628                                                | 5,549               | 47.40%                             | 18.30%                |         |
|                                        | Care needs level 2       |         | 3,068                                                                           | 2,116                                                | 5,184               | 40.80%                             | 17.10%                |         |
|                                        | Care needs level 3       |         | 2,552                                                                           | 1,454                                                | 4,006               | 36.30%                             | 13.20%                |         |
|                                        | Care needs level 4       |         | 2,722                                                                           | 977                                                  | 3,699               | 26.40%                             | 12.20%                |         |
|                                        | Care needs level 5       |         | 3,209                                                                           | 495                                                  | 3,704               | 13.40%                             | 12.20%                |         |
| Year of certification criteria adopted | 2009                     | 0       | 8,172                                                                           | 3,565                                                | 11,737              | 30.40%                             | 38.60%                | <0.001  |
|                                        | 2012                     |         | 10,487                                                                          | 8,163                                                | 18,650              | 43.80%                             | 61.40%                |         |
| Turn in bed                            | Independent              | 0       | 5,158                                                                           | 4,071                                                | 9,229               | 44.10%                             | 30.40%                | <0.001  |
|                                        | Can do holding railings  |         | 9,604                                                                           | 6,609                                                | 16,213              | 40.80%                             | 53.40%                |         |
|                                        | Fully assisted           |         | 3,897                                                                           | 1,048                                                | 4,945               | 21.20%                             | 16.30%                |         |
| Get up                                 | Independent              | 0       | 1,233                                                                           | 947                                                  | 2,180               | 43.40%                             | 7.20%                 | <0.001  |
|                                        | Can do holding railings  |         | 12,765                                                                          | 9,659                                                | 22,424              | 43.10%                             | 73.80%                |         |
|                                        | Fully assisted           |         | 4,661                                                                           | 1,122                                                | 5,783               | 19.40%                             | 19.00%                |         |
| Maintain sitting position              | Independent              | 0       | 5,270                                                                           | 4,387                                                | 9,657               | 45.40%                             | 31.80%                | <0.001  |
|                                        | Can do holding railings  |         | 6,457                                                                           | 4,756                                                | 11,213              | 42.40%                             | 36.90%                |         |

| Features                    | Level                            | Missing | Stable or Improved<br>(care needs remained the same or decreased)<br>n = 18,659 | Deteriorated<br>(care needs increased)<br>n = 11,728 | Total<br>N = 30,387 | Deterioration<br>Proportion<br>(%) | % in each<br>category | P value |
|-----------------------------|----------------------------------|---------|---------------------------------------------------------------------------------|------------------------------------------------------|---------------------|------------------------------------|-----------------------|---------|
|                             | Partially assisted               |         | 6,024                                                                           | 2,470                                                | 8,494               | 29.10%                             | 28.00%                |         |
|                             | Fully assisted                   |         | 908                                                                             | 115                                                  | 1,023               | 11.20%                             | 3.40%                 |         |
| Sitting, with feet dangling | Independent                      | 0       | 18,659                                                                          | 11,728                                               | 30,387              | 38.60%                             | 100.00%               | 1       |
| Stand on both feet          | Independent                      | 0       | 6,378                                                                           | 5,288                                                | 11,666              | 45.30%                             | 38.40%                | <0.001  |
|                             | Partially assisted               |         | 8,025                                                                           | 5,464                                                | 13,489              | 40.50%                             | 44.40%                |         |
|                             | Fully assisted                   |         | 4,256                                                                           | 976                                                  | 5,232               | 18.70%                             | 17.20%                |         |
| Walk                        | Independent                      | 0       | 3,409                                                                           | 2,614                                                | 6,023               | 43.40%                             | 19.80%                | <0.001  |
|                             | Can do with assistive technology |         | 8,997                                                                           | 7,233                                                | 16,230              | 44.60%                             | 53.40%                |         |
|                             | Fully assisted                   |         | 6,253                                                                           | 1,881                                                | 8,134               | 23.10%                             | 26.80%                |         |
| Transfer                    | Independent                      | 0       | 8,722                                                                           | 7,480                                                | 16,202              | 46.20%                             | 53.30%                | <0.001  |
|                             | Needs supervision                |         | 3,177                                                                           | 2,099                                                | 5,276               | 39.80%                             | 17.40%                |         |
|                             | Partially assisted               |         | 2,702                                                                           | 1,278                                                | 3,980               | 32.10%                             | 13.10%                |         |
|                             | Fully assisted                   |         | 4,058                                                                           | 871                                                  | 4,929               | 17.70%                             | 16.20%                |         |
| Stand up                    | Independent                      | 0       | 485                                                                             | 400                                                  | 885                 | 45.20%                             | 2.90%                 | <0.001  |
|                             | Can do holding railings          |         | 13,465                                                                          | 10,181                                               | 23,646              | 43.10%                             | 77.80%                |         |
|                             | Fully assisted                   |         | 4,709                                                                           | 1,147                                                | 5,856               | 19.60%                             | 19.30%                |         |
| Stand on one foot           | Independent                      | 0       | 613                                                                             | 459                                                  | 1,072               | 42.80%                             | 3.50%                 | <0.001  |
|                             | Can do holding railings          |         | 9,228                                                                           | 7,502                                                | 16,730              | 44.80%                             | 55.10%                |         |

| Features                        | Level              | Missing | Stable or Improved<br>(care needs remained the same or decreased)<br>n = 18,659 | Deteriorated<br>(care needs increased)<br>n = 11,728 | Total<br>N = 30,387 | Deterioration<br>Proportion<br>(%) | % in each<br>category | P value |
|---------------------------------|--------------------|---------|---------------------------------------------------------------------------------|------------------------------------------------------|---------------------|------------------------------------|-----------------------|---------|
|                                 | Fully assisted     |         | 8,818                                                                           | 3,767                                                | 12,585              | 29.90%                             | 41.40%                |         |
| Stepping into a bathtub         | Independent        | 0       | 18,659                                                                          | 11,728                                               | 30,387              | 38.60%                             | 100.00%               | 1       |
| Bathing                         | Independent        | 0       | 5,112                                                                           | 4,728                                                | 9,840               | 48.00%                             | 32.40%                | <0.001  |
|                                 | Partially assisted |         | 5,393                                                                           | 4,119                                                | 9,512               | 43.30%                             | 31.30%                |         |
|                                 | Fully assisted     |         | 6,973                                                                           | 2,499                                                | 9,472               | 26.40%                             | 31.20%                |         |
|                                 | Does not take bath |         | 1,181                                                                           | 382                                                  | 1,563               | 24.40%                             | 5.10%                 |         |
| Bedsores                        | Present            | 0       | 18,659                                                                          | 11,728                                               | 30,387              | 38.60%                             | 100.00%               | 1       |
| Skin disease                    | Present            | 0       | 18,659                                                                          | 11,728                                               | 30,387              | 38.60%                             | 100.00%               | 1       |
| Raising an arm till chest level | Capable            | 0       | 18,659                                                                          | 11,728                                               | 30,387              | 38.60%                             | 100.00%               | 1       |
| Swallowing                      | Independent        | 0       | 11,863                                                                          | 8,887                                                | 20,750              | 42.80%                             | 68.30%                | <0.001  |
|                                 | Needs supervision  |         | 5,982                                                                           | 2,760                                                | 8,742               | 31.60%                             | 28.80%                |         |
|                                 | Fully assisted     |         | 814                                                                             | 81                                                   | 895                 | 9.10%                              | 2.90%                 |         |
| Urination urge                  | Present            | 0       | 18,659                                                                          | 11,728                                               | 30,387              | 38.60%                             | 100.00%               | 1       |
| Bowel movement urge             | Present            | 0       | 18,659                                                                          | 11,728                                               | 30,387              | 38.60%                             | 100.00%               | 1       |
| Cleaning after urination        | Independent        | 0       | 18,659                                                                          | 11,728                                               | 30,387              | 38.60%                             | 100.00%               | 1       |
| Cleaning after bowel movement   | Independent        | 0       | 18,659                                                                          | 11,728                                               | 30,387              | 38.60%                             | 100.00%               | 1       |
| Eating                          | Independent        | 0       | 12,166                                                                          | 9,628                                                | 21,794              | 44.20%                             | 71.70%                | <0.001  |
|                                 | Needs supervision  |         | 2,395                                                                           | 1,195                                                | 3,590               | 33.30%                             | 11.80%                |         |

| Features                      | Level              | Missing | Stable or Improved<br>(care needs remained the same or decreased)<br>n = 18,659 | Deteriorated<br>(care needs increased)<br>n = 11,728 | Total<br>N = 30,387 | Deterioration<br>Proportion<br>(%) | % in each<br>category | P value |
|-------------------------------|--------------------|---------|---------------------------------------------------------------------------------|------------------------------------------------------|---------------------|------------------------------------|-----------------------|---------|
|                               | Partially assisted |         | 1,791                                                                           | 584                                                  | 2,375               | 24.60%                             | 7.80%                 |         |
|                               | Fully assisted     |         | 2,307                                                                           | 321                                                  | 2,628               | 12.20%                             | 8.60%                 |         |
| Oral hygiene                  | Independent        | 0       | 9,663                                                                           | 8,356                                                | 18,019              | 46.40%                             | 59.30%                | <0.001  |
|                               | Partially assisted |         | 4,925                                                                           | 2,468                                                | 7,393               | 33.40%                             | 24.30%                |         |
|                               | Fully assisted     |         | 4,071                                                                           | 904                                                  | 4,975               | 18.20%                             | 16.40%                |         |
| Washing face                  | Independent        | 0       | 9,895                                                                           | 8,481                                                | 18,376              | 46.20%                             | 60.50%                | <0.001  |
|                               | Partially assisted |         | 4,733                                                                           | 2,371                                                | 7,104               | 33.40%                             | 23.40%                |         |
|                               | Fully assisted     |         | 4,031                                                                           | 876                                                  | 4,907               | 17.90%                             | 16.10%                |         |
| Hair care                     | Independent        | 0       | 10,727                                                                          | 8,885                                                | 19,612              | 45.30%                             | 64.50%                | <0.001  |
|                               | Partially assisted |         | 3,122                                                                           | 1,606                                                | 4,728               | 34.00%                             | 15.60%                |         |
|                               | Fully assisted     |         | 4,810                                                                           | 1,237                                                | 6,047               | 20.50%                             | 19.90%                |         |
| Cutting nails                 | Independent        | 0       | 5,116                                                                           | 4,543                                                | 9,659               | 47.00%                             | 31.80%                | <0.001  |
|                               | Partially assisted |         | 3,683                                                                           | 2,912                                                | 6,595               | 44.20%                             | 21.70%                |         |
|                               | Fully assisted     |         | 9,860                                                                           | 4,273                                                | 14,133              | 30.20%                             | 46.50%                |         |
| Buttoning/unbuttoning clothes | Unknown            | 0       | 18,659                                                                          | 11,728                                               | 30,387              | 38.60%                             | 100.00%               | 1       |
| Putting on/ removing top      | Independent        | 0       | 8,022                                                                           | 7,168                                                | 15,190              | 47.20%                             | 50.00%                | <0.001  |
|                               | Needs supervision  |         | 1,670                                                                           | 1,239                                                | 2,909               | 42.60%                             | 9.60%                 |         |
|                               | Partially assisted |         | 4,532                                                                           | 2,368                                                | 6,900               | 34.30%                             | 22.70%                |         |

| Features                     | Level                    | Missing | Stable or Improved<br>(care needs remained the same or decreased)<br>n = 18,659 | Deteriorated<br>(care needs increased)<br>n = 11,728 | Total<br>N = 30,387 | Deterioration<br>Proportion<br>(%) | % in each<br>category | P value |
|------------------------------|--------------------------|---------|---------------------------------------------------------------------------------|------------------------------------------------------|---------------------|------------------------------------|-----------------------|---------|
|                              | Fully assisted           |         | 4,435                                                                           | 953                                                  | 5,388               | 17.70%                             | 17.70%                |         |
| Putting on/removing pants    | Independent              | 0       | 7,672                                                                           | 6,916                                                | 14,588              | 47.40%                             | 48.00%                | <0.001  |
|                              | Needs supervision        |         | 1,575                                                                           | 1,203                                                | 2,778               | 43.30%                             | 9.10%                 |         |
|                              | Partially assisted       |         | 3,851                                                                           | 2,228                                                | 6,079               | 36.70%                             | 20.00%                |         |
|                              | Fully assisted           |         | 5,561                                                                           | 1,381                                                | 6,942               | 19.90%                             | 22.80%                |         |
| Putting on/removing socks    | Unknown                  | 0       | 18,659                                                                          | 11,728                                               | 30,387              | 38.60%                             | 100.00%               | 1       |
| Cleaning up rooms            | Unknown                  | 0       | 18,659                                                                          | 11,728                                               | 30,387              | 38.60%                             | 100.00%               | 1       |
| Taking medication            | Independent              | 0       | 5,798                                                                           | 5,138                                                | 10,936              | 47.00%                             |                       | <0.001  |
|                              | Partially assisted       |         | 7,106                                                                           | 4,847                                                | 11,953              | 40.60%                             | 39.30%                |         |
|                              | Fully assisted           |         | 5,755                                                                           | 1,743                                                | 7,498               | 23.20%                             | 24.70%                |         |
| Managing money               | Independent              | 0       | 4,699                                                                           | 4,264                                                | 8,963               | 47.60%                             | 29.50%                | <0.001  |
|                              | Partially assisted       |         | 3,088                                                                           | 2,489                                                | 5,577               | 44.60%                             | 18.40%                |         |
|                              | Fully assisted           |         | 10,872                                                                          | 4,975                                                | 15,847              | 31.40%                             | 52.20%                |         |
| Severe forgetfulness         | Absent                   | 0       | 18,659                                                                          | 11,728                                               | 30,387              | 38.60%                             | 100.00%               | 1       |
| Indifference to surroundings | Absent                   | 0       | 18,659                                                                          | 11,728                                               | 30,387              | 38.60%                             | 100.00%               | 1       |
| Vision                       | Normal                   | 0       | 11,021                                                                          | 7,397                                                | 18,418              | 40.20%                             | 60.60%                | <0.001  |
|                              | Able to see over 1m away |         | 5,294                                                                           | 3,403                                                | 8,697               | 39.10%                             | 28.60%                |         |
|                              | Nearsightedness          |         | 1,270                                                                           | 692                                                  | 1,962               | 35.30%                             | 6.50%                 |         |

| Features                        | Level                    | Missing | Stable or Improved<br>(care needs remained the same or decreased)<br>n = 18,659 | Deteriorated<br>(care needs increased)<br>n = 11,728 | Total<br>N = 30,387 | Deterioration<br>Proportion<br>(%) | % in each<br>category | P value |
|---------------------------------|--------------------------|---------|---------------------------------------------------------------------------------|------------------------------------------------------|---------------------|------------------------------------|-----------------------|---------|
|                                 | Poor sight               |         | 368                                                                             | 144                                                  | 512                 | 28.10%                             | 1.70%                 |         |
|                                 | Cannot be judged         |         | 706                                                                             | 92                                                   | 798                 | 11.50%                             | 2.60%                 |         |
| Hearing ability                 | Normal                   | 0       | 7,600                                                                           | 5,064                                                | 12,664              | 40.00%                             | 41.70%                | <0.001  |
|                                 | Manages to hear          |         | 5,849                                                                           | 3,811                                                | 9,660               | 39.50%                             | 31.80%                |         |
|                                 | Able to hear loud sounds |         | 4,359                                                                           | 2,614                                                | 6,973               | 37.50%                             | 22.90%                |         |
|                                 | Poor hearing             |         | 436                                                                             | 195                                                  | 631                 | 30.90%                             | 2.10%                 |         |
|                                 | Cannot be judged         |         | 415                                                                             | 44                                                   | 459                 | 9.60%                              | 1.50%                 |         |
| Expressing intentions           | Capable                  | 0       | 11,419                                                                          | 8,855                                                | 20,274              | 43.70%                             | 66.70%                | <0.001  |
|                                 | Sometimes capable        |         | 4,066                                                                           | 2033                                                 | 6,099               | 33.30%                             | 20.10%                |         |
|                                 | Almost incapable         |         | 2,078                                                                           | 684                                                  | 2,762               | 24.80%                             | 9.10%                 |         |
|                                 | Incapable                |         | 1,096                                                                           | 156                                                  | 1,252               | 12.50%                             | 4.10%                 |         |
| Responding to request           | Capable                  | 0       | 18,659                                                                          | 11,728                                               | 30,387              | 38.60%                             | 100.00%               | 1       |
| Understanding the daily routine | Capable                  | 0       | 10,814                                                                          | 8,507                                                | 19,321              | 44.00%                             | 63.60%                | <0.001  |
|                                 | Incapable                |         | 7,845                                                                           | 3,221                                                | 11,066              | 29.10%                             | 36.40%                |         |
| Remembering birth date          | Capable                  | 0       | 15,018                                                                          | 10,641                                               | 25,659              | 41.50%                             | 84.40%                | <0.001  |
|                                 | Incapable                |         | 3,641                                                                           | 1,087                                                | 4,728               | 23.00%                             | 15.60%                |         |
| Short-term memory               | Capable                  | 0       | 9,929                                                                           | 7,622                                                | 17,551              | 43.40%                             | 57.80%                | <0.001  |
|                                 | Incapable                |         | 8,730                                                                           | 4,106                                                | 12,836              | 32.00%                             | 42.20%                |         |



| Features                                       | Level             | Missing | Stable or Improved<br>(care needs remained the same or decreased)<br>n = 18,659 | Deteriorated<br>(care needs increased)<br>n = 11,728 | Total<br>N = 30,387 | Deterioration<br>Proportion<br>(%) | % in each<br>category | P value |
|------------------------------------------------|-------------------|---------|---------------------------------------------------------------------------------|------------------------------------------------------|---------------------|------------------------------------|-----------------------|---------|
| Remembering one's name                         | Capable           | 0       | 16,886                                                                          | 11,380                                               | 28,266              | 40.30%                             | 93.00%                | <0.001  |
|                                                | Incapable         |         | 1,773                                                                           | 348                                                  | 2,121               | 16.40%                             | 7.00%                 |         |
| Aware of current season                        | Capable           | 0       | 12,475                                                                          | 9,337                                                | 21,812              | 42.80%                             | 71.80%                | <0.001  |
|                                                | Incapable         |         | 6,184                                                                           | 2,391                                                | 8,575               | 27.90%                             | 28.20%                |         |
| Recognizing places                             | Capable           | 0       | 14,254                                                                          | 10,310                                               | 24,564              | 42.00%                             | 80.80%                | <0.001  |
|                                                | Incapable         |         | 4,405                                                                           | 1,418                                                | 5,823               | 24.40%                             | 19.20%                |         |
| Conviction to be threatened                    | Absent            | 0       | 16,313                                                                          | 10,135                                               | 26,448              | 38.30%                             | 87.00%                | 0.005   |
|                                                | Sometimes present |         | 1,026                                                                           | 646                                                  | 1,672               | 38.60%                             | 5.50%                 |         |
|                                                | Present           |         | 1,320                                                                           | 947                                                  | 2,267               | 41.80%                             | 7.50%                 |         |
| Delusional thoughts and imaginary conversation | Absent            | 0       | 15,327                                                                          | 9,578                                                | 24,905              | 38.50%                             | 82.00%                | 0.137   |
|                                                | Sometimes present |         | 1,286                                                                           | 879                                                  | 2,165               | 40.60%                             | 7.10%                 |         |
|                                                | Present           |         | 2046                                                                            | 1,271                                                | 3,317               | 38.30%                             | 10.90%                |         |
| Illusion                                       | Absent            | 0       | 18,659                                                                          | 11,728                                               | 30,387              | 38.60%                             | 100.00%               | 1       |
| Emotional instability                          | Absent            | 0       | 14,075                                                                          | 8,873                                                | 22,948              | 38.70%                             | 75.50%                | 0.004   |
|                                                | Sometimes present |         | 2017                                                                            | 1,367                                                | 3,384               | 40.40%                             | 11.10%                |         |
|                                                | Present           |         | 2,567                                                                           | 1,488                                                | 4,055               | 36.70%                             | 13.30%                |         |
| Day–night reversal                             | Absent            | 0       | 15,084                                                                          | 9,970                                                | 25,054              | 39.80%                             | 82.40%                | <0.001  |
|                                                | Sometimes present |         | 1,680                                                                           | 904                                                  | 2,584               | 35.00%                             | 8.50%                 |         |

| Features                      | Level             | Missing | Stable or Improved<br>(care needs remained the same or decreased)<br>n = 18,659 | Deteriorated<br>(care needs increased)<br>n = 11,728 | Total<br>N = 30,387 | Deterioration<br>Proportion<br>(%) | % in each<br>category | P value |
|-------------------------------|-------------------|---------|---------------------------------------------------------------------------------|------------------------------------------------------|---------------------|------------------------------------|-----------------------|---------|
|                               | Present           |         | 1,895                                                                           | 854                                                  | 2,749               | 31.10%                             | 9.00%                 |         |
| Violent behaviors             | Unknown           | 0       | 18,659                                                                          | 11,728                                               | 30,387              | 38.60%                             | 100.00%               | 1       |
| Speech repetition             | Absent            | 0       | 12,311                                                                          | 7,297                                                | 19,608              | 37.20%                             | 64.50%                | <0.001  |
|                               | Sometimes present |         | 1922                                                                            | 1,401                                                | 3,323               | 42.20%                             | 10.90%                |         |
|                               | Present           |         | 4,426                                                                           | 3,030                                                | 7,456               | 40.60%                             | 24.50%                |         |
| Screaming/Calling out         | Absent            | 0       | 15,957                                                                          | 10,412                                               | 26,369              | 39.50%                             | 86.80%                | <0.001  |
|                               | Sometimes present |         | 1,274                                                                           | 642                                                  | 1916                | 33.50%                             | 6.30%                 |         |
|                               | Present           |         | 1,428                                                                           | 674                                                  | 2,102               | 32.10%                             | 6.90%                 |         |
| Resistance to care            | Absent            | 0       | 14,698                                                                          | 9,702                                                | 24,400              | 39.80%                             | 80.30%                | <0.001  |
|                               | Sometimes present |         | 1,675                                                                           | 957                                                  | 2,632               | 36.40%                             | 8.70%                 |         |
|                               | Present           |         | 2,286                                                                           | 1,069                                                | 3,355               | 31.90%                             | 11.00%                |         |
| Frequent wandering            | Absent            | 0       | 17,567                                                                          | 11,161                                               | 28,728              | 38.90%                             | 94.50%                | <0.001  |
|                               | Sometimes present |         | 353                                                                             | 223                                                  | 576                 | 38.70%                             | 1.90%                 |         |
|                               | Present           |         | 739                                                                             | 344                                                  | 1,083               | 31.80%                             | 3.60%                 |         |
| Restlessness                  | Absent            | 0       | 17,224                                                                          | 10,936                                               | 28,160              | 38.80%                             | 92.70%                | 0.007   |
|                               | Sometimes present |         | 620                                                                             | 327                                                  | 947                 | 34.50%                             | 3.10%                 |         |
|                               | Present           |         | 815                                                                             | 465                                                  | 1,280               | 36.30%                             | 4.20%                 |         |
| Not returning after going out | Absent            | 0       | 17,889                                                                          | 11,234                                               | 29,123              | 38.60%                             | 95.80%                | 0.238   |

| Features                        | Level              | Missing | Stable or Improved<br>(care needs remained the same or decreased)<br>n = 18,659 | Deteriorated<br>(care needs increased)<br>n = 11,728 | Total<br>N = 30,387 | Deterioration<br>Proportion<br>(%) | % in each<br>category | P value |
|---------------------------------|--------------------|---------|---------------------------------------------------------------------------------|------------------------------------------------------|---------------------|------------------------------------|-----------------------|---------|
|                                 | Sometimes absent   |         | 293                                                                             | 211                                                  | 504                 | 41.90%                             | 1.70%                 |         |
|                                 | Present            |         | 477                                                                             | 283                                                  | 760                 | 37.20%                             | 2.50%                 |         |
| Insistence on going out alone   | Absent             | 0       | 17,642                                                                          | 11,154                                               | 28,796              | 38.70%                             | 94.80%                | 0.011   |
|                                 | Sometimes present  |         | 429                                                                             | 274                                                  | 703                 | 39.00%                             | 2.30%                 |         |
|                                 | Present            |         | 588                                                                             | 300                                                  | 888                 | 33.80%                             | 2.90%                 |         |
| Hoarding behavior               | Absent             | 0       | 17,903                                                                          | 11,211                                               | 29,114              | 38.50%                             | 95.80%                | 0.108   |
|                                 | Sometimes present  |         | 244                                                                             | 147                                                  | 391                 | 37.60%                             | 1.30%                 |         |
|                                 | Present            |         | 512                                                                             | 370                                                  | 882                 | 42.00%                             | 2.90%                 |         |
| Mismanagement of fire           | Unknown            | 0       | 18,659                                                                          | 11,728                                               | 30,387              | 38.60%                             | 100.00%               | 1       |
| Destroying objects and clothing | Absent             | 0       | 18,305                                                                          | 11,528                                               | 29,833              | 38.60%                             | 98.20%                | 0.3     |
|                                 | Sometimes present  |         | 160                                                                             | 99                                                   | 259                 | 38.20%                             | 0.90%                 |         |
|                                 | Present            |         | 194                                                                             | 101                                                  | 295                 | 34.20%                             | 1.00%                 |         |
| Unhygienic behaviors            | Unknown            | 0       | 18,659                                                                          | 11,728                                               | 30,387              | 38.60%                             | 100.00%               | 1       |
| Pica behaviors                  | Unknown            | 0       | 18,659                                                                          | 11,728                                               | 30,387              | 38.60%                             | 100.00%               | 1       |
| Inappropriate sexual behavior   | Unknown            | 0       | 18,659                                                                          | 11,728                                               | 30,387              | 38.60%                             | 100.00%               | 1       |
| Movement                        | Independent        | 0       | 7,097                                                                           | 6,243                                                | 13,340              | 46.80%                             | 43.90%                | <0.001  |
|                                 | Needs supervision  |         | 3,832                                                                           | 2,805                                                | 6,637               | 42.30%                             | 21.80%                |         |
|                                 | Partially assisted |         | 2,814                                                                           | 1,456                                                | 4,270               | 34.10%                             | 14.10%                |         |

| Features                   | Level                                   | Missing | Stable or Improved<br>(care needs remained the same or decreased)<br>n = 18,659 | Deteriorated<br>(care needs increased)<br>n = 11,728 | Total<br>N = 30,387 | Deterioration<br>Proportion<br>(%) | % in each<br>category | P value |
|----------------------------|-----------------------------------------|---------|---------------------------------------------------------------------------------|------------------------------------------------------|---------------------|------------------------------------|-----------------------|---------|
|                            | Fully assisted                          |         | 4,916                                                                           | 1,224                                                | 6,140               | 19.90%                             | 20.20%                |         |
| Cleaning after urination   | Unknown                                 | 0       | 18,659                                                                          | 11,728                                               | 30,387              | 38.60%                             | 100.00%               | 1       |
| Passing urine/ Urination   | Independent                             | 0       | 8,030                                                                           | 7,216                                                | 15,246              | 47.30%                             | 50.20%                | <0.001  |
|                            | Needs supervision                       |         | 1,225                                                                           | 880                                                  | 2,105               | 41.80%                             | 6.90%                 |         |
|                            | Partially assisted                      |         | 3,766                                                                           | 2,167                                                | 5,933               | 36.50%                             | 19.50%                |         |
|                            | Fully assisted                          |         | 5,638                                                                           | 1,465                                                | 7,103               | 20.60%                             | 23.40%                |         |
| Passing motion/ Defecation | Independent                             | 0       | 8,606                                                                           | 7,582                                                | 16,188              | 46.80%                             | 53.30%                | <0.001  |
|                            | Needs supervision                       |         | 1,187                                                                           | 807                                                  | 1,994               | 40.50%                             | 6.60%                 |         |
|                            | Partially assisted                      |         | 3,190                                                                           | 1,858                                                | 5,048               | 36.80%                             | 16.60%                |         |
|                            | Fully assisted                          |         | 5,676                                                                           | 1,481                                                | 7,157               | 20.70%                             | 23.60%                |         |
| Managing money             | Unknown                                 | 0       | 18,659                                                                          | 11,728                                               | 30,387              | 38.60%                             | 100.00%               | 1       |
| Everyday decision-making   | Capable                                 | 0       | 4,761                                                                           | 3,976                                                | 8,737               | 45.50%                             | 28.80%                | <0.001  |
|                            | Capable except during special occasions |         | 7,322                                                                           | 5,246                                                | 12,568              | 41.70%                             | 41.40%                |         |
|                            | Capable but very challenging            |         | 4,396                                                                           | 2,045                                                | 6,441               | 31.70%                             | 21.20%                |         |
|                            | Incapable                               |         | 2,180                                                                           | 461                                                  | 2,641               | 17.50%                             | 8.70%                 |         |
| Forgetfulness              | Absent                                  | 0       | 8,570                                                                           | 5,198                                                | 13,768              | 37.80%                             | 45.30%                | <0.001  |
|                            | Sometimes present                       |         | 3,234                                                                           | 2,464                                                | 5,698               | 43.20%                             | 18.80%                |         |
|                            | Present                                 |         | 6,855                                                                           | 4,066                                                | 10,921              | 37.20%                             | 35.90%                |         |

| Features                        | Level                  | Missing | Stable or Improved<br>(care needs remained the same or decreased)<br>n = 18,659 | Deteriorated<br>(care needs increased)<br>n = 11,728 | Total<br>N = 30,387 | Deterioration<br>Proportion<br>(%) | % in each<br>category | P value |
|---------------------------------|------------------------|---------|---------------------------------------------------------------------------------|------------------------------------------------------|---------------------|------------------------------------|-----------------------|---------|
| Activity level during daytime   | Unknown                | 0       | 18,659                                                                          | 11,728                                               | 30,387              | 38.60%                             | 100.00%               | 1       |
| Frequency of going out          | More than once a week  | 0       | 8,683                                                                           | 7,055                                                | 15,738              | 44.80%                             | 51.80%                | <0.001  |
|                                 | More than once a month |         | 2,811                                                                           | 1,972                                                | 4,783               | 41.20%                             | 15.70%                |         |
|                                 | Less than once a month |         | 7,165                                                                           | 2,701                                                | 9,866               | 27.40%                             | 32.50%                |         |
| Change in environment           | Unknown                | 0       | 18,659                                                                          | 11,728                                               | 30,387              | 38.60%                             | 100.00%               | 1       |
| Self-talk / laughing to oneself | Absent                 | 0       | 16,720                                                                          | 10,746                                               | 27,466              | 39.10%                             | 90.40%                | <0.001  |
|                                 | Sometimes present      |         | 643                                                                             | 346                                                  | 989                 | 35.00%                             | 3.30%                 |         |
|                                 | Present                |         | 1,296                                                                           | 636                                                  | 1,932               | 32.90%                             | 6.40%                 |         |
| Selfish behaviors               | Absent                 | 0       | 16,186                                                                          | 10,195                                               | 26,381              | 38.60%                             | 86.80%                | 0.135   |
|                                 | Sometimes present      |         | 1,021                                                                           | 681                                                  | 1,702               | 40.00%                             | 5.60%                 |         |
|                                 | Present                |         | 1,452                                                                           | 852                                                  | 2,304               | 37.00%                             | 7.60%                 |         |
| Disorganized talking            | Absent                 | 0       | 13,812                                                                          | 8,911                                                | 22,723              | 39.20%                             | 74.80%                | <0.001  |
|                                 | Sometimes present      |         | 1,866                                                                           | 1,244                                                | 3,110               | 40.00%                             | 10.20%                |         |
|                                 | Present                |         | 2,981                                                                           | 1,573                                                | 4,554               | 34.50%                             | 15.00%                |         |
| Not fitting in a group          | Absent                 | 0       | 16,986                                                                          | 10,695                                               | 27,681              | 38.60%                             | 91.10%                | 0.194   |
|                                 | Sometimes present      |         | 731                                                                             | 487                                                  | 1,218               | 40.00%                             | 4.00%                 |         |
|                                 | Present                |         | 942                                                                             | 546                                                  | 1,488               | 36.70%                             | 4.90%                 |         |
| Shopping                        | Independent            | 0       | 1,942                                                                           | 1,790                                                | 3,732               | 48.00%                             | 12.30%                | <0.001  |

| Features           | Level              | Missing | Stable or Improved<br>(care needs remained the same or decreased)<br>n = 18,659 | Deteriorated<br>(care needs increased)<br>n = 11,728 | Total<br>N = 30,387 | Deterioration<br>Proportion<br>(%) | % in each<br>category | P value |
|--------------------|--------------------|---------|---------------------------------------------------------------------------------|------------------------------------------------------|---------------------|------------------------------------|-----------------------|---------|
|                    | Needs supervision  |         | 134                                                                             | 149                                                  | 283                 | 52.70%                             | 0.90%                 |         |
|                    | Partially assisted |         | 2,793                                                                           | 2,665                                                | 5,458               | 48.80%                             | 18.00%                |         |
|                    | Fully assisted     |         | 13,790                                                                          | 7,124                                                | 20,914              | 34.10%                             | 68.80%                |         |
| Light cooking      | Independent        | 0       | 3,624                                                                           | 3,446                                                | 7,070               | 48.70%                             | 23.30%                | <0.001  |
|                    | Needs supervision  |         | 199                                                                             | 208                                                  | 407                 | 51.10%                             | 1.30%                 |         |
|                    | Partially assisted |         | 1,369                                                                           | 1,347                                                | 2,716               | 49.60%                             | 8.90%                 |         |
|                    | Fully assisted     |         | 13,467                                                                          | 6,727                                                | 20,194              | 33.30%                             | 66.50%                |         |
| Bedridden (levels) | Independent        | 0       | 53                                                                              | 48                                                   | 101                 | 47.50%                             | 0.30%                 | <0.001  |
|                    | J1                 |         | 1,251                                                                           | 1,130                                                | 2,381               | 47.50%                             | 7.80%                 |         |
|                    | J2                 |         | 2,641                                                                           | 2,368                                                | 5,009               | 47.30%                             | 16.50%                |         |
|                    | A1                 |         | 3,268                                                                           | 3,049                                                | 6,317               | 48.30%                             | 20.80%                |         |
|                    | A2                 |         | 4,283                                                                           | 2,850                                                | 7,133               | 40.00%                             | 23.50%                |         |
|                    | B1                 |         | 1,595                                                                           | 815                                                  | 2,410               | 33.80%                             | 7.90%                 |         |
|                    | B2                 |         | 2,693                                                                           | 986                                                  | 3,679               | 26.80%                             | 12.10%                |         |
|                    | C1                 |         | 782                                                                             | 189                                                  | 971                 | 19.50%                             | 3.20%                 |         |
|                    | C2                 |         | 2,093                                                                           | 293                                                  | 2,386               | 12.30%                             | 7.90%                 |         |
| Dementia (levels)  | Independent        | 0       | 2,779                                                                           | 2,134                                                | 4,913               | 43.40%                             | 16.20%                | <0.001  |
|                    | I                  |         | 4,539                                                                           | 3,812                                                | 8,351               | 45.60%                             | 27.50%                |         |

| Features              | Level                        | Missing | Stable or Improved<br>(care needs remained the same or decreased)<br>n = 18,659 | Deteriorated<br>(care needs increased)<br>n = 11,728 | Total<br>N = 30,387 | Deterioration<br>Proportion<br>(%) | % in each<br>category | P value |
|-----------------------|------------------------------|---------|---------------------------------------------------------------------------------|------------------------------------------------------|---------------------|------------------------------------|-----------------------|---------|
|                       | IIa                          |         | 1,849                                                                           | 1,398                                                | 3,247               | 43.10%                             | 10.70%                |         |
|                       | IIb                          |         | 3,284                                                                           | 2,052                                                | 5,336               | 38.50%                             | 17.60%                |         |
|                       | IIIa                         |         | 3,331                                                                           | 1,550                                                | 4,881               | 31.80%                             | 16.10%                |         |
|                       | IIIb                         |         | 937                                                                             | 354                                                  | 1,291               | 27.40%                             | 4.20%                 |         |
|                       | IV                           |         | 1,680                                                                           | 406                                                  | 2,086               | 19.50%                             | 6.90%                 |         |
|                       | M                            |         | 260                                                                             | 22                                                   | 282                 | 7.80%                              | 0.90%                 |         |
| Short-term memory     | Unknown                      | 0       | 5                                                                               | 4                                                    | 9                   | 44.40%                             | 0.00%                 | <0.001  |
|                       | Capable                      |         | 6,792                                                                           | 5,119                                                | 11,911              | 43.00%                             | 39.20%                |         |
|                       | Problematic                  |         | 11,862                                                                          | 6,605                                                | 18,467              | 35.80%                             | 60.80%                |         |
| Cognitive ability     | Unknown                      | 0       | 6                                                                               | 5                                                    | 11                  | 45.50%                             | 0.00%                 | <0.001  |
|                       | Independent                  |         | 6,819                                                                           | 5,389                                                | 12,208              | 44.10%                             | 40.20%                |         |
|                       | Somewhat challenging         |         | 4,798                                                                           | 3,364                                                | 8,162               | 41.20%                             | 26.90%                |         |
|                       | Needs assistance             |         | 4,117                                                                           | 2,129                                                | 6,246               | 34.10%                             | 20.60%                |         |
|                       | Cannot be judged             |         | 2,919                                                                           | 841                                                  | 3,760               | 22.40%                             | 12.40%                |         |
| Communication ability | Unknown                      | 0       | 5                                                                               | 8                                                    | 13                  | 61.50%                             | 0.00%                 | <0.001  |
|                       | Capable                      |         | 8,460                                                                           | 6,689                                                | 15,149              | 44.20%                             | 49.90%                |         |
|                       | Somewhat challenging         |         | 4,715                                                                           | 3,004                                                | 7,719               | 38.90%                             | 25.40%                |         |
|                       | Limited to specific requests |         | 3,727                                                                           | 1,645                                                | 5,372               | 30.60%                             | 17.70%                |         |

| Features | Level                            | Missing | Stable or Improved<br>(care needs remained the same or decreased)<br>n = 18,659 | Deteriorated<br>(care needs increased)<br>n = 11,728 | Total<br>N = 30,387 | Deterioration<br>Proportion<br>(%) | % in each<br>category | P value |
|----------|----------------------------------|---------|---------------------------------------------------------------------------------|------------------------------------------------------|---------------------|------------------------------------|-----------------------|---------|
|          | Incapable                        |         | 1,752                                                                           | 382                                                  | 2,134               | 17.90%                             | 7.00%                 |         |
| Eating   | Unknown                          | 0       | 33                                                                              | 7                                                    | 40                  | 17.50%                             | 0.10%                 | <0.001  |
|          | Independent                      |         | 16,267                                                                          | 11,336                                               | 27,603              | 41.10%                             | 90.80%                |         |
|          | Fully dependent                  |         | 2,359                                                                           | 385                                                  | 2,744               | 14.00%                             | 9.00%                 |         |
| BPSD     | Unknown                          | 0       | 3,551                                                                           | 2,141                                                | 5,692               | 37.60%                             | 18.70%                | <0.001  |
|          | Present                          |         | 4,063                                                                           | 2,067                                                | 6,130               | 33.70%                             | 20.20%                |         |
|          | Absent                           |         | 11,045                                                                          | 7,520                                                | 18,565              | 40.50%                             | 61.10%                |         |
| BPSD     | Others                           | 0       | 392                                                                             | 223                                                  | 615                 | 36.30%                             | 2.00%                 | <0.001  |
|          | Filthy behaviors                 |         | 99                                                                              | 31                                                   | 130                 | 23.80%                             | 0.40%                 |         |
|          | Refusal to care                  |         | 375                                                                             | 140                                                  | 515                 | 27.20%                             | 1.70%                 |         |
|          | Delusion                         |         | 980                                                                             | 573                                                  | 1,553               | 36.90%                             | 5.10%                 |         |
|          | Visual/auditory<br>hallucination |         | 15,563                                                                          | 10,185                                               | 25,748              | 39.60%                             | 84.70%                |         |
|          | Wandering                        |         | 169                                                                             | 88                                                   | 257                 | 34.20%                             | 0.80%                 |         |
|          | Sexual disinhibition             |         | 1                                                                               | 5                                                    | 6                   | 83.30%                             | 0.00%                 |         |
|          | Day–night reversal               |         | 526                                                                             | 185                                                  | 711                 | 26.00%                             | 2.30%                 |         |
|          | Assaulting                       |         | 30                                                                              | 11                                                   | 41                  | 26.80%                             | 0.10%                 |         |
|          | Violent language                 |         | 378                                                                             | 149                                                  | 527                 | 28.30%                             | 1.70%                 |         |
|          | Mismanagement of fire            |         | 125                                                                             | 130                                                  | 255                 | 51.00%                             | 0.80%                 |         |



| Features                                                  | Level                  | Missing | Stable or Improved<br>(care needs remained the same or decreased)<br>n = 18,659 | Deteriorated<br>(care needs increased)<br>n = 11,728 | Total<br>N = 30,387 | Deterioration<br>Proportion<br>(%) | % in each<br>category | P value |
|-----------------------------------------------------------|------------------------|---------|---------------------------------------------------------------------------------|------------------------------------------------------|---------------------|------------------------------------|-----------------------|---------|
| Paralysis in limbs                                        | Pica behaviors         |         | 21                                                                              | 8                                                    | 29                  | 27.60%                             | 0.10%                 | <0.001  |
|                                                           | Others                 | 0       | 275                                                                             | 260                                                  | 535                 | 48.60%                             | 1.80%                 |         |
| Joint movement without restriction                        | Right_upper_limb       |         | 1,282                                                                           | 838                                                  | 2,120               | 39.50%                             | 7.00%                 | <0.001  |
|                                                           | Right_lower_limb       |         | 349                                                                             | 321                                                  | 670                 | 47.90%                             | 2.20%                 |         |
|                                                           | Left_upper_limb        |         | 3,431                                                                           | 1,423                                                | 4,854               | 29.30%                             | 16.00%                |         |
|                                                           | Left_lower_limb        |         | 8,533                                                                           | 5,360                                                | 13,893              | 38.60%                             | 45.70%                |         |
|                                                           | No_paralysis           |         | 4,789                                                                           | 3,526                                                | 8,315               | 42.40%                             | 27.40%                |         |
|                                                           | Others                 | 0       | 1,507                                                                           | 1,109                                                | 2,616               | 42.40%                             | 8.60%                 |         |
| Medical treatment in the last 2 weeks_Intravenous therapy | Hips                   |         | 1,442                                                                           | 787                                                  | 2,229               | 35.30%                             | 7.30%                 | <0.001  |
|                                                           | Shoulders              |         | 3,912                                                                           | 1,941                                                | 5,853               | 33.20%                             | 19.30%                |         |
|                                                           | Knees                  |         | 3,655                                                                           | 2,629                                                | 6,284               | 41.80%                             | 20.70%                |         |
|                                                           | No restrictions        |         | 8,143                                                                           | 5,262                                                | 13,405              | 39.30%                             | 44.10%                |         |
|                                                           | Skin disease treatment | 0       | 341                                                                             | 73                                                   | 414                 | 17.60%                             | 1.40%                 |         |
| Medical treatment in the last 2 weeks_Intravenous therapy | Catheter               |         | 371                                                                             | 83                                                   | 454                 | 18.30%                             | 1.50%                 | <0.001  |
|                                                           | Stoma treatment        |         | 115                                                                             | 23                                                   | 138                 | 16.70%                             | 0.50%                 |         |
|                                                           | Monitoring             |         | 36                                                                              | 18                                                   | 54                  | 33.30%                             | 0.20%                 |         |
|                                                           | Respirator             |         | 8                                                                               | 3                                                    | 11                  | 27.30%                             | 0.00%                 |         |

| <b>Features</b> | <b>Level</b>             | <b>Missing</b> | <b>Stable or Improved<br/>(care needs remained the same or decreased)<br/>n = 18,659</b> | <b>Deteriorated<br/>(care needs increased)<br/>n = 11,728</b> | <b>Total<br/>N = 30,387</b> | <b>Deterioration<br/>Proportion<br/>(%)</b> | <b>% in each<br/>category</b> | <b>P value</b> |
|-----------------|--------------------------|----------------|------------------------------------------------------------------------------------------|---------------------------------------------------------------|-----------------------------|---------------------------------------------|-------------------------------|----------------|
|                 | Central venous nutrition |                | 87                                                                                       | 4                                                             | 91                          | 4.40%                                       | 0.30%                         |                |
|                 | Tracheostomy             |                | 26                                                                                       |                                                               | 26                          | 0.00%                                       | 0.10%                         |                |
|                 | Infusion management      |                | 16,559                                                                                   | 11,229                                                        | 27,788                      | 40.40%                                      | 91.40%                        |                |
|                 | Care for pain            |                | 81                                                                                       | 52                                                            | 133                         | 39.10%                                      | 0.40%                         |                |
|                 | Tube feeding             |                | 484                                                                                      | 59                                                            | 543                         | 10.90%                                      | 1.80%                         |                |
|                 | Dialysis                 |                | 180                                                                                      | 72                                                            | 252                         | 28.60%                                      | 0.80%                         |                |
|                 | Oxygen treatment         |                | 371                                                                                      | 112                                                           | 483                         | 23.20%                                      | 1.60%                         |                |

Table B.3. Accuracy and Model Fitness Results of Care Needs Level Predictive Model in Three Years.

| Model               | Classes | Accuracy<br>(Mean $\pm$ SD), % |
|---------------------|---------|--------------------------------|
| GBDT                | 4       | 74.64 $\pm$ 0.04               |
| GBDT                | 9       | 53.87 $\pm$ 0.55               |
| Logistic Regression | 9       | 41.52 $\pm$ 7.91               |

# Confusion Matrix

3 year prediction

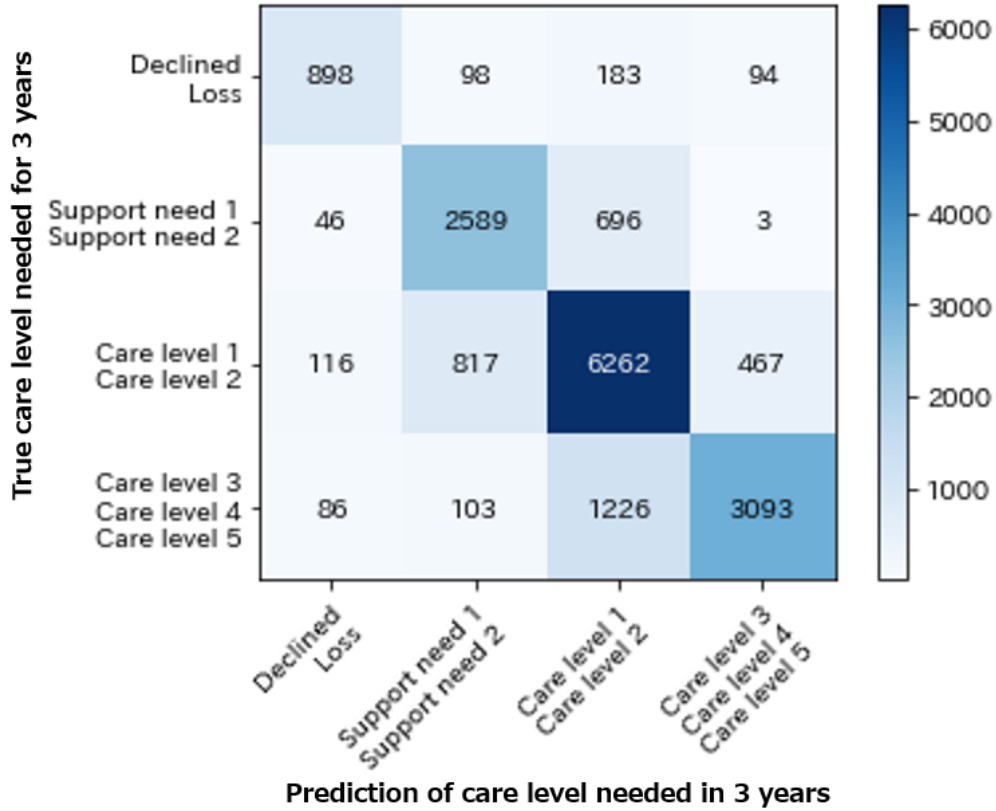

Fig. B.1. Confusion Matrix of the Four-Category Predictive Model.

# Confusion Matrix

3 year prediction

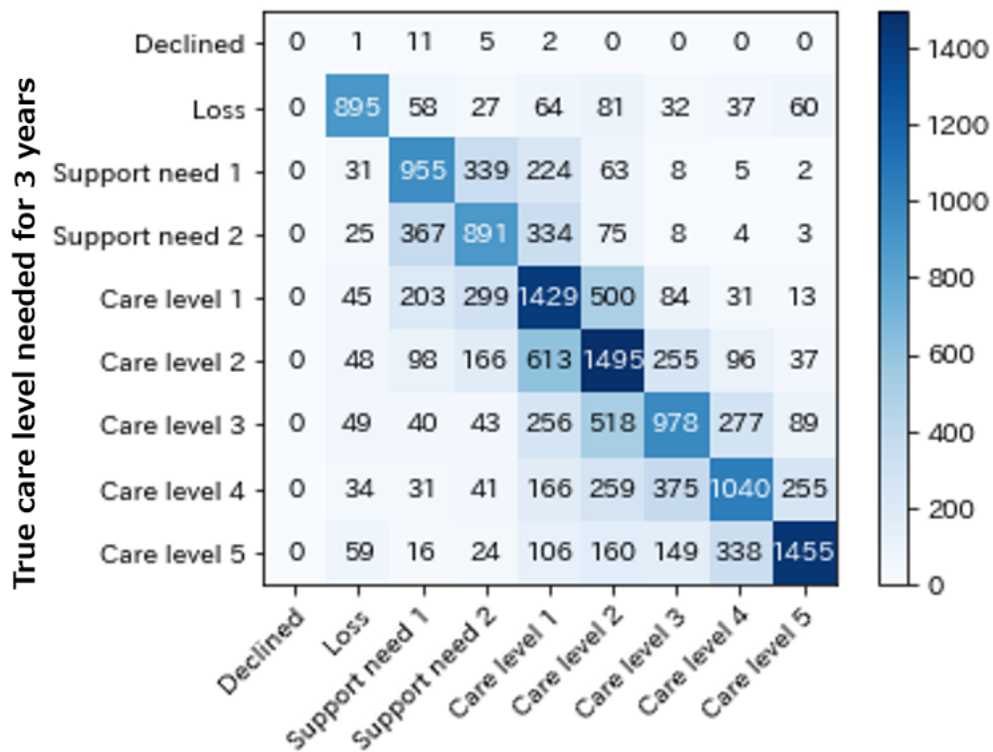

**Prediction of care level needed in 3 years**

Fig. B.2. Confusion Matrix of the Nine-Category Predictive Model.

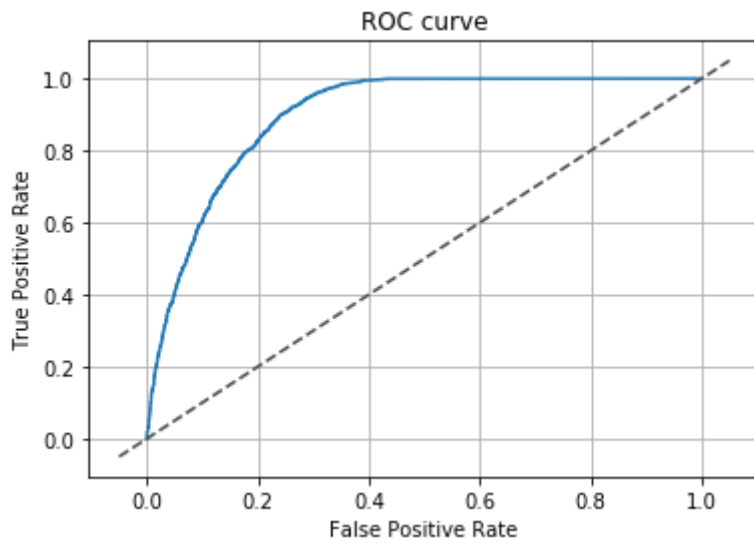

Fig. B.3. ROC Curve of the Binary Gradient Boosting Decision Tree Model.

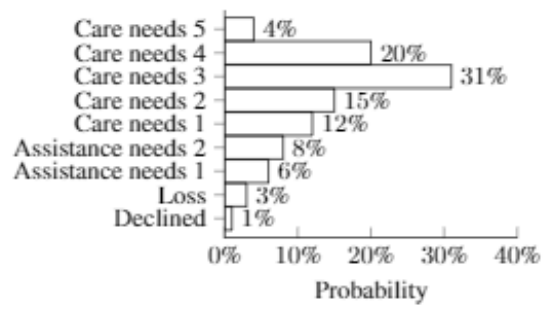

Fig. B.4. Probability distribution of an insureds' predictions.
